# Supplementary material
Source: publisher figshare collection journal article supplement (https://acs.figshare.com/ndownloader/files/5067151)
Supplement: Supplementary file 1 [file 5067151]

# **Studies in Macrolide Antibiotic Synthesis: The Role of Tethered Alkoxides in Titanium Alkoxide-mediated Regioselective Reductive Coupling Reactions**

Adilah B. Bahadoor and Glenn C. Micalizio\*

Department of Chemistry, Yale University, New Haven, CT 06520

E-mail: [glenn.micalizio@yale.edu](mailto:glenn.micalizio@yale.edu)

## **SUPPORTING INFORMATION-1:**

**General.** All reactions were conducted in flame dried glassware under nitrogen using anhydrous solvents. Toluene was dried by distillation over sodium benzophenone ketyl. Dichloromethane, tetrahydrofuran and diethylether were used after passing through activated alumina columns. Methyl sulfoxide was purchased from Aldrich Chemical Company in Sure/Seal<sup>TM</sup> containers and used as received. Triethylamine was dried by distillation over CaH<sub>2</sub>. All chiral aldehydes were obtained from a Swern or Dess-Martin oxidation of the corresponding primary alcohol and used without purification. All other commercially available reagents were used as received.

<sup>1</sup>H NMR data were recorded at 500 MHz or 400 MHz using a Bruker AM-500, a Bruker Avance DPX-500 or a Bruker AM-400 instrument. <sup>1</sup>H NMR chemical shifts are reported relative to residual CHCl<sub>3</sub> (7.27 ppm) or C<sub>6</sub>H<sub>6</sub> (7.16 ppm). <sup>13</sup>C NMR data were recorded at 126 MHz using a Bruker AM-500 or a Bruker Avance DPX-500 instrument. <sup>13</sup>C chemical shifts are reported relative to the central line of CDCl<sub>3</sub> (77.23 ppm) or C<sub>6</sub>D<sub>6</sub> (128.00 ppm). Infrared spectra were recorded using a Midac Spectrometer M-series. Low resolution mass spectrometry was performed on a Waters Micromass<sup>®</sup> ZQ<sup>TM</sup> instrument using electrospray ionization (EI). Optical rotations were measured on Perkin Elmer Model 341 polarimeter using a 1 mL capacity micro cell with a 10 cm path length.

Chromatographic purifications were performed using 60Å, 35-75µm particle size silica gel from Silicycle. All compounds purified by chromatography were sufficiently pure for use in further experiments, unless indicated otherwise.

For all reductive coupling reactions, the major diastereomer was tentatively assigned as the product derived from net Felkin-selective addition in accord with our previous observations.<sup>2</sup> (Compounds **7a'**, **7a''**, **43-50**, **54-69**)

### General procedure for the Swern oxidation:

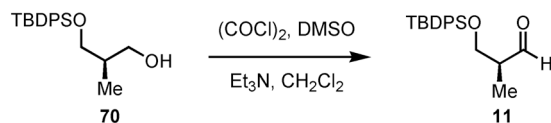

Methyl sulfoxide (177  $\mu$ L, 2.47 mmol) in CH<sub>2</sub>Cl<sub>2</sub> (1.6 mL) was added via cannula to a cooled solution of (COCl)<sub>2</sub> (106  $\mu$ L, 1.23 mmol) in CH<sub>2</sub>Cl<sub>2</sub> (2.6 mL) at  $-78$  °C. After stirring for 15 min, alcohol **70** (270 mg, 0.82 mmol) in CH<sub>2</sub>Cl<sub>2</sub> (1.6 mL) was added slowly via cannula. The resulting cloudy solution was stirred for 1 h before adding Et<sub>3</sub>N (0.52 mL, 3.70 mmol) neat. The reaction was then warmed to 0 °C and stirred for 15 min after which 1.5 mL of water was added. The reaction mixture was then poured into a separatory funnel containing 15 mL of EtOAc and the organic layer was washed with water (2  $\times$  10 mL), sat. NH<sub>4</sub>Cl (3  $\times$  10 mL), sat. NaHCO<sub>3</sub> (1  $\times$  10 mL) and brine successively. Crude aldehyde **11** was obtained after drying over anhydrous MgSO<sub>4</sub> followed by solvent removal. The aldehyde was further dried by azeotropic removal of water (concentration 3  $\times$  from anhydrous benzene).

### 1. Assembly of the seco-acid precursor of (9*S*)-dihydroerythronolide A (1<sup>st</sup> generation approach).

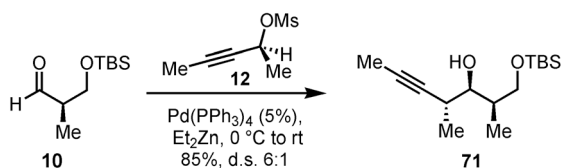

### (2*R*,3*R*,4*R*)-1-(*tert*-butyldimethylsilyloxy)-2,4-dimethyl-5-heptyn-3-ol, **15**:<sup>1</sup>

A solution of mesylate **12** (7.15 g, 44.1 mmol) in THF (10 mL) and a solution of aldehyde **10** (5.00 g, 24.5 mmol) in THF (10 mL) were added successively via cannula to

a stirring solution of  $\text{Pd}(\text{PPh}_3)_4$  (1.41 g, 1.22 mmol) in THF (117 mL) at room temperature. The flask was cooled to 0 °C before adding a freshly prepared solution of  $\text{Et}_2\text{Zn}$  (58.3 mmol, 58.3 mL, 1.0 M in hexanes) dropwise over 1 h via cannula. The reaction was slowly warmed to room temperature and stirred for 8 h. The flask was then cooled to 0 °C and 50 mL of a saturated solution of  $\text{NH}_4\text{Cl}$  was added. The aqueous layer was extracted with EtOAc ( $3 \times 70$  mL) and the combined organic layer was washed with sat  $\text{NaHCO}_3$ , brine and dried over anhydrous  $\text{MgSO}_4$ . The crude material was purified by flash column chromatography on silica gel eluting successively with 2 %, 4 % and 6 % EtOAc/ hexanes to provide 5.63 g (85 %) of **71** as 6:1 mixture of diastereomers as determined after analysis of the crude. Alcohol **71** was immediately used in the next step.

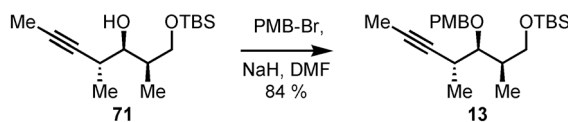

**(2*R*,3*R*,4*R*)-1-(*tert*-butyldimethylsilyloxy)-3-(*p*-methoxybenzyloxy)-2,4-**

**dimethyl-5-heptyn, 13.** Sodium hydride (310 mg, 7.75 mmol) was added at once to a stirring solution of homopropargyl alcohol **71** (d.r. = 6:1; 1.91 g, 7.05 mmol) and PMB-Br (1.84 g, 9.16 mmol) in DMF (47 mL) at –20 °C. The reaction was allowed to reach room temperature and stirred for 48 h before pouring into a separatory funnel containing EtOAc (100 mL) and water (80 mL). The phases were separated and the organic layer further washed with water ( $3 \times 80$  mL), sat.  $\text{NaHCO}_3$ , brine and dried over anhydrous  $\text{Na}_2\text{SO}_4$ . The residue obtained after solvent removal was purified by flash column chromatography on silica gel eluting successively with 1 %, 2 % and 3 % EtOAc/ hexanes to afford 1.89 g (84 %) of pure **13**.  $[\alpha]_{589}^{20} -16.3^\circ$  ( $c$  0.93,  $\text{CHCl}_3$ );  $^1\text{H}$  NMR (400 MHz,  $\text{CDCl}_3$ )  $\delta$  7.32-7.30 (m, 2H), 6.89-6.86 (m, 2H), 4.74 (A of AB,  $J = 13.5$  Hz,

1H), 4.53 (B of AB,  $J = 13.5$  Hz, 1H), 3.81 (s, 3H), 3.57 (dd,  $J = 12.3, 6.1$  Hz, 1H), 3.48 (dd,  $J = 12.3, 7.6$  Hz, 1H), 3.44 (dd,  $J = 8.8, 5.1$  Hz, 1H), 2.75-2.69 (m, 1H), 1.98-1.89 (m, 1H), 1.81 (d,  $J = 3.0$  Hz, 3H), 1.14 (d,  $J = 8.8$  Hz, 3H), 0.91 (s, 9H), 0.89 (d,  $J = 8.7$  Hz, 1H), 0.05 (s, 6H);  $^{13}\text{C}$  NMR (100 MHz,  $\text{CDCl}_3$ )  $\delta$  159.2, 131.6, 129.9, 129.7, 113.8, 82.4, 82.2, 74.4, 65.8, 55.5, 38.4, 29.7, 26.1, 18.4, 11.4, 3.9, -5.1, -5.2; IR (thin film, NaCl) 2955, 2929, 2858, 1514, 1249, 1093, 1039, 836, 775  $\text{cm}^{-1}$ ; LRMS (EI, Na) calcd for  $\text{C}_{23}\text{H}_{38}\text{O}_3\text{Si}$ , 413.63  $m/z$  ( $\text{M} + \text{Na}$ ); observed, 413.42 ( $\text{M} + \text{Na}$ ) $^+$   $m/z$

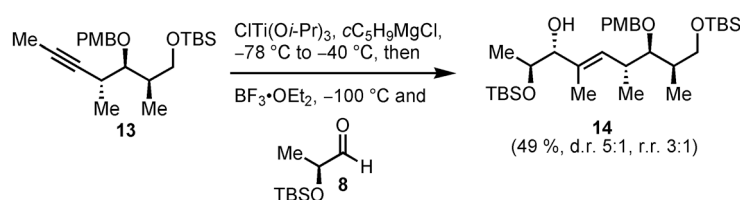

**(*E*)-(2*R*,3*R*,4*R*,7*R*,8*S*)-1,8-di(*tert*-butyldimethylsilanyloxy)-3-(*p*-methoxybenzyloxy)-2,4,6-trimethylnon-5-ene-7-ol, 14.** To a  $-78^\circ\text{C}$  solution of alkyne **13** (500 mg, 1.29 mmol; d.r. = 6:1) in 13 mL of toluene, was added sequentially  $\text{ClTi}(\text{O}i\text{-Pr})_3$  (1.0 M in hexanes; 2.84 mL, 2.84 mmol) and  $c\text{-C}_5\text{H}_9\text{MgCl}$  (2.0 M in diethyl ether; 2.84 mL, 5.68 mmol) in a dropwise manner via a dry gas-tight syringe. The resulting yellow solution was slowly warmed to  $-40^\circ\text{C}$  and stirred for 1 h during which the reaction turned dark brown. The flask was then cooled to  $-78^\circ\text{C}$  and  $\text{BF}_3 \cdot \text{OEt}_2$  (360  $\mu\text{L}$ , 2.84 mmol) was added in a dropwise manner. Following a stirring period of 10 min at  $-78^\circ\text{C}$ , the flask was further cooled to  $-100^\circ\text{C}$  by immersing into a liquid  $\text{N}_2$ / pentane bath. Aldehyde **8** (778 mg, 4.13 mmol) was then added as a solution in toluene (0.5 mL) down the side of the flask via a gas tight syringe. The transfer was completed with additional toluene ( $2 \times 0.5$  mL). Stirring was maintained for 1 h at  $-100^\circ\text{C}$ , before warming to  $-78^\circ\text{C}$ . Saturated  $\text{NH}_4\text{Cl}$  solution (10 mL) was then added and the

suspension was allowed to reach ambient temperature before partitioning between EtOAc (20 mL) and water (10 mL). The phases were separated and the aqueous layer was extracted with EtOAc (3 × 20 mL). The combined organic layer was then washed with sat. NaHCO<sub>3</sub> solution (2 × 40 mL), brine (1 × 40 mL) and dried over anhydrous Na<sub>2</sub>SO<sub>4</sub>. The crude material was purified by flash column chromatography on silica gel eluting successively with 2 %, 4 %, 6 %, 10 % and 15 % EtOAc -hexanes to provide 370 mg (49 %) of a diastereomeric mixture of **14** (d.r. = 5:1 at C7).  $[\alpha]_{589}^{20} -5.1^\circ$  (*c* 0.65, CHCl<sub>3</sub>); <sup>1</sup>H NMR (500 MHz, CDCl<sub>3</sub>) δ 7.26-7.24 (m, 2H), 6.87-6.85 (m, 2H), 5.57 (d, *J* = 9.6 Hz, 1H), 4.55 (A of AB, *J* = 10.8 Hz, 1H), 4.46 (B of AB, *J* = 10.8 Hz, 1H), 3.96 (d, *J* = 3.5 Hz, 1H), 3.96-3.93 (m, 1H), 3.80 (s, 3H), 3.52 (dd, *J* = 9.7, 7.0 Hz, 1H), 3.44 (dd, *J* = 9.7, 6.1 Hz, 1H), 3.39 (dd, *J* = 6.7, 4.0 Hz, 1H), 2.80-2.68 (m, 1H), 1.87-1.81 (m, 1H), 1.61 (s, 3H), 0.98 (d, *J* = 9.1 Hz, 3H), 0.96 (d, *J* = 6.9 Hz, 3H), 0.93-0.91 (m, 21H), 0.097 (s, 3H), 0.088 (s, 3H), 0.045 (s, 3H), 0.038 (s, 3H); <sup>13</sup>C NMR (126 MHz, CDCl<sub>3</sub>) δ 159.1, 132.6, 132.1, 130.0, 129.3, 113.8, 83.4, 79.2, 74.5, 70.8, 66.0, 55.5, 38.8, 35.6, 26.2, 26.0, 18.5, 18.3, 18.1, 17.1, 14.1, 11.6, -4.3, -4.7, -5.13, -5.15; IR (thin film, NaCl) 2955, 2929, 2856, 1514, 1471, 1463, 1249, 1087, 1039, 836, 775, 668 cm<sup>-1</sup>; LRMS (EI, Na) calcd for C<sub>32</sub>H<sub>60</sub>O<sub>5</sub>Si<sub>2</sub>, 603.99 *m/z* (M + Na); observed, 603.46 (M + Na)<sup>+</sup> *m/z*.

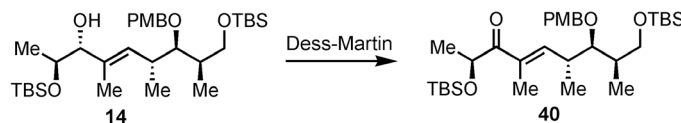

**(*E*)-(2*R*,3*R*,4*R*,8*S*)-1,8-di(*tert*-butyldimethylsilanyloxy)-3-(*p*-methoxybenzyloxy)-**

**2,4,6-trimethylnon-5-ene-7-one, 40.** To a stirring solution of **14** (370 mg, 0.637 mmol) in dichloromethane (12 mL, reagent grade from a bottle) was added 1,1,1-triacetoxy-1,1-dihydro-1,2-benziodoxol-3-(1*H*)-one (540 mg, 1.28 mmol) at room temperature. After 1

h of stirring, the reaction was diluted with a solution of 20 % EtOAc/ hexanes (10 mL) and most of the solvent was removed. The residue was dissolved in 30 mL of EtOAc/ hexanes and washed with a 1:1 mixture of 10 % Na<sub>2</sub>S<sub>2</sub>O<sub>3</sub> and sat NaHCO<sub>3</sub> until a clear organic layer was obtained. The organic layer was then washed with brine and dried over anhydrous Na<sub>2</sub>SO<sub>4</sub>. The solvent was concentrated and the residue was purified by flash column chromatography eluting with 10 % EtOAc/ hexanes to afford 335 mg of enone **40** (91 %). Enone **40** was immediately used in the following step.

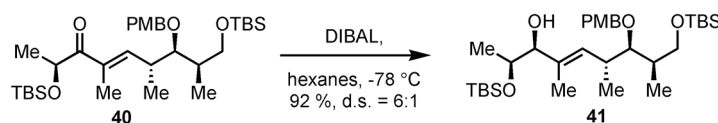

**(E)-(2R,3R,4R,7S,8S)-1,8-di(*tert*-butyldimethylsilyloxy)-3-(*p*-methoxybenzyloxy)-2,4,6-trimethylnon-5-ene-7-ol, **41**.** To a cooled solution of enone **40** (573 mg, 0.990 mmol) in hexanes at -78 °C was added DIBAL (1.0 M in hexanes; 1.48 mL, 1.48 mmol) slowly via syringe down the side of the flask. After stirring for 10 min, 2.0 mL of MeOH was added followed by 5 mL of saturated Rochelle salt solution. The suspension was allowed to reach room temperature before diluting with EtOAc (10 mL) and water (10 mL). The phases were separated and the aqueous layer was further extracted with EtOAc (3 × 10 mL). The combined organic layer was then washed with NaHCO<sub>3</sub> (2 × 20 mL) and brine. After drying over anhydrous Na<sub>2</sub>SO<sub>4</sub>, the solvent was removed and the residue was purified by flash column chromatography eluting with 8 % EtOAc/ hexanes affording 528 mg of unsaturated alcohol **41** (92 %, d.s. = 6:1 from <sup>1</sup>H NMR of crude product). [ $\alpha$ ]<sub>589</sub><sup>20</sup> +12.8 ° (*c* 0.67, CHCl<sub>3</sub>); <sup>1</sup>H NMR (500 MHz, CDCl<sub>3</sub>)  $\delta$  7.29-7.27 (m, 2H), 6.87-6.86 (m, 2H), 5.48 (d, *J* = 9.8 Hz, 1H), 4.56 (A of AB, *J* = 10.6 Hz, 1H), 4.45 (B of AB, *J* = 10.6 Hz, 1H), 3.80 (s, 3H), 3.77-3.68 (m, 2H), 3.53 (dd, *J* =

9.8, 6.7 Hz, 1H), 3.46 (dd,  $J = 9.8, 6.0$  Hz, 1H), 3.38 (dd,  $J = 6.2, 4.4$  Hz, 1H), 2.76-2.69 (m, 1H), 1.87-1.78 (m, 1H), 1.64 (d,  $J = 1.1$  Hz, 3H), 1.05 (d,  $J = 5.9$  Hz, 3H), 0.94-0.91 (m, 24H), 0.12 (s, 3H), 0.11 (s, 3H), 0.051 (s, 3H), 0.049 (s, 3H);  $^{13}\text{C}$  NMR (126 MHz,  $\text{CDCl}_3$ )  $\delta$  159.2, 133.5, 133.2, 131.9, 129.6, 113.8, 83.3, 74.6, 71.3, 66.0, 55.5, 38.9, 35.7, 26.2, 26.1, 20.3, 18.5, 18.3, 18.1, 12.1, 11.8, -3.8, -4.5, -5.13, -5.15; IR (thin film, NaCl) 2956, 2929, 2856, 1249, 1132, 1087, 1040, 1005, 835, 776, 671  $\text{cm}^{-1}$ ; LRMS (EI, Na) calcd for  $\text{C}_{32}\text{H}_{60}\text{O}_5\text{Si}_2$ , 603.99  $m/z$  ( $\text{M} + \text{Na}$ ); observed, 603.43 ( $\text{M} + \text{Na}$ ) $^+$   $m/z$ .

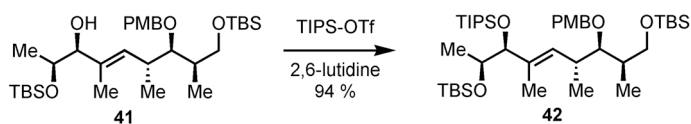

**(*E*)-(2*R*,3*R*,4*R*,7*S*,8*S*)-1,8-di(*tert*-butyldimethylsilanyloxy)-3-(*p*-methoxybenzyloxy)-7-(*tri*-isopropylsilanyloxy)-2,4,6-trimethylnon-5-ene, **42**.** To a cooled solution of allylic alcohol **41** (198 mg, 0.339 mmol) and 2,6-lutidine (0.12 mL, 1.0 mmol) in dichloromethane (3.4 mL) at 0 °C, was added TIPS-OTf (0.14 mL, 0.51 mmol) dropwise. The reaction was held at 0 °C for 1 h before diluting with 20 % EtOAc/hexanes (10 mL). The organic layer was then washed with saturated  $\text{NaHCO}_3$  ( $2 \times 10$  mL), brine and dried over anhydrous  $\text{Na}_2\text{SO}_4$ . The solvent was concentrated and the residue was purified by flash column chromatography eluting with 2 % EtOAc/hexanes affording 237 mg of **42** (94 %).  $[\alpha]_{589}^{20} -24.0^\circ$  ( $c$  0.84,  $\text{CHCl}_3$ );  $^1\text{H}$  NMR (500 MHz,  $\text{CDCl}_3$ ) 7.27-7.26 (m, 2H), 6.86-6.85 (m, 2H), 5.62 (d,  $J = 9.6$  Hz, 1H), 4.60 (A of AB,  $J = 10.9$  Hz, 1H), 4.48 (B of AB,  $J = 10.9$  Hz, 1H), 4.12 (d,  $J = 4.4$  Hz, 1H), 3.91-3.86 (m, 1H), 3.81 (s, 3H), 3.48 (dd,  $J = 9.7, 5.6$  Hz, 1H), 3.44 (dd,  $J = 9.7, 5.9$  Hz, 1H), 3.36 (dd,  $J = 5.2, 5.2$  Hz, 1H), 2.80-2.71 (m, 1H), 1.85-1.76 (m, 1H), 1.68 (d,  $J = 0.8$  Hz, 3H), 1.052-1.046 (m, 21H), 0.99-0.96 (m, 9H), 0.91 (s, 9H), 0.88 (s, 9H), 0.05 (s, 3H),



0.039(s, 3H), 0.038 (s, 3H), 0.031 (s, 3H);  $^{13}\text{C}$  NMR (126 MHz,  $\text{CDCl}_3$ )  $\delta$  159.0, 133.9, 132.1, 129.6, 129.0, 113.7, 84.1, 79.7, 74.3, 72.9, 66.0, 55.5, 18.5, 18.37, 18.36, 18.3, 18.2, 18.1, 15.4, 12.9, 1.7, -4.35, -4.40, -5.2; IR (thin film, NaCl) 2956, 2929, 2856, 1513, 1463, 1249, 1105, 835, 774, 680  $\text{cm}^{-1}$ ; LRMS (EI, Na) calcd for  $\text{C}_{41}\text{H}_{80}\text{O}_5\text{Si}_3$ , 760.33  $m/z$  ( $\text{M} + \text{Na}$ ); observed, 760.77 ( $\text{M} + \text{Na}$ ) $^+$   $m/z$ .

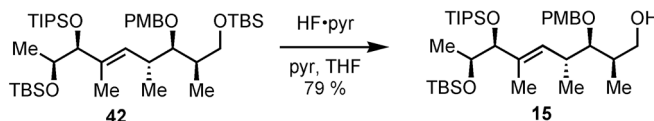

**(*E*)-(2*R*,3*R*,4*R*,7*S*,8*S*)-8-di(*tert*-butyldimethylsilyloxy)-3-(*p*-methoxybenzyloxy)-7-(*tri*-isopropylsilyloxy)-2,4,6-trimethylnon-5-ene-1-ol, **15**.** To a solution of **42** (237 g, 0.321 mmol) in 5 mL of THF was added successively 0.72 mL of pyridine and 0.97 mL of  $\text{HF}\cdot\text{pyr}$  complex. After stirring at room temperature for 2 h, the reaction flask was immersed in an ice-bath and saturated  $\text{NaHCO}_3$  (10 mL) was added carefully. The phases were separated and the aqueous layer was extracted with EtOAc (3  $\times$  20 mL). The combined organic layer was washed with brine and dried over anhydrous  $\text{Na}_2\text{SO}_4$ . The solvent was concentrated and the residue was purified by flash column chromatography eluting successively with 2 % and 30 % EtOAc/ hexanes to afford 159 mg of **15** (79 %).  $[\alpha]_{589}^{20} -29.7^\circ$  ( $c$  0.56,  $\text{CHCl}_3$ );  $^1\text{H}$  NMR (500 MHz,  $\text{CDCl}_3$ ) 7.28-7.26 (m, 2H), 6.88-6.85 (m, 2H), 5.63 (d,  $J = 9.8$  Hz, 1H), 4.63 (A of AB,  $J = 11.1$  Hz, 1H), 4.49 (B of AB,  $J = 11.1$  Hz, 1H), 4.14 (d,  $J = 4.3$  Hz, 1H), 3.92-3.88 (m, 1H), 3.81 (s, 3H), 3.59 (dd,  $J = 10.7, 6.4$  Hz, 1H), 3.50 (dd,  $J = 10.7, 5.0$  Hz, 1H), 3.41 (dd,  $J = 4.9, 4.9$  Hz, 1H), 2.88-2.77 (m, 1H), 1.98-1.90 (m, 1H), 1.70 (d,  $J = 1.0$  Hz, 3H), 1.05-0.99 (m, 30H), 0.88 (s, 9H), 0.054 (s, 3H), 0.048 (s, 3H);  $^{13}\text{C}$  NMR (126 MHz,  $\text{CDCl}_3$ )  $\delta$  159.2, 134.3, 131.4, 129.4, 129.2, 128.6, 113.9, 84.8, 79.6, 73.6, 72.9, 66.7, 55.5, 38.2,

35.1, 26.1, 18.44, 18.36, 18.2, 18.0, 15.5, 12.6, 12.5, -4.3, -4.4; IR (thin film, NaCl) 3419, 2958, 2867, 1514, 1463, 1389, 1249, 1101, 1039, 883, 835, 735, 678  $\text{cm}^{-1}$ ; LRMS (EI, Na) calcd for  $\text{C}_{35}\text{H}_{66}\text{O}_5\text{Si}_2$ , 645.07  $m/z$  ( $\text{M} + \text{Na}$ ); observed, 645.75 ( $\text{M} + \text{Na}$ )<sup>+</sup>  $m/z$ .

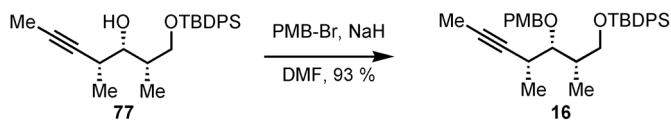

**(2*S*,3*S*,4*R*)-1-(*tert*-butyldiphenylsilyloxy)-3-(*p*-methoxybenzyloxy)-2,4-**

**dimethyl-5-heptyn, 16.** Sodium hydride (137 mg, 3.43 mmol) was added at once to a stirring solution of homopropargyl alcohol **77**<sup>2</sup> (1.23 g, 3.12 mmol) and PMB-Br (755 mg, 3.74 mmol) in DMF (16 mL) at -20 °C. The reaction was allowed to reach room temperature and stirred overnight before pouring into a separatory funnel containing EtOAc (30 mL) and water (20 mL). The phases were separated and the organic layer further washed with water (3 × 20 mL), sat.  $\text{NaHCO}_3$ , brine and dried over anhydrous  $\text{Na}_2\text{SO}_4$ . The residue obtained after solvent removal was purified by flash column chromatography on silica gel eluting successively with 1 %, 2 % and 3 % EtOAc/hexanes to afford 1.49 g (93 %) of pure **16**.  $[\alpha]_{589}^{20} -1.32^\circ$  ( $c$  0.38,  $\text{CHCl}_3$ );  $^1\text{H}$  NMR (500 MHz,  $\text{CDCl}_3$ )  $\delta$  7.71-7.68 (m, 4H), 7.46-7.37 (m, 6H), 7.23-7.21 (m, 2H), 6.86-6.84 (m, 2H), 4.60 (A of AB,  $J = 11.1$  Hz, 1H), 4.55 (B of AB,  $J = 11.1$  Hz, 1H), 3.81 (s, 3H), 3.67-3.34 (m, 2H), 3.55 (dd,  $J = 9.8, 5.7$  Hz, 1H), 2.68-2.61 (m, 1H), 2.37-2.29 (m, 1H), 1.83 (d,  $J = 2.4$  Hz, 3H), 1.27 (d,  $J = 2.9$  Hz, 3H), 1.10 (s, 9H), 0.85 (d,  $J = 6.9$  Hz, 3H);  $^{13}\text{C}$  NMR (126 MHz,  $\text{CDCl}_3$ )  $\delta$  159.3, 135.9, 135.8, 134.2, 134.1, 131.4, 129.8, 129.5, 127.9, 127.8, 113.9, 82.5, 81.9, 74.9, 66.8, 55.5, 38.8, 29.9, 27.1, 19.5, 18.6, 14.4, 10.6, 3.8; IR (thin film, NaCl) 2965, 2933, 2958, 1514, 1465, 1428, 1248, 112, 1079, 1039,

824, 702  $\text{cm}^{-1}$ ; LRMS (EI, Na) calcd for  $\text{C}_{33}\text{H}_{42}\text{O}_3\text{Si}$ , 537.77  $m/z$  ( $\text{M} + \text{Na}$ ); observed, 537.55 ( $\text{M} + \text{Na}$ ) $^{+}$   $m/z$

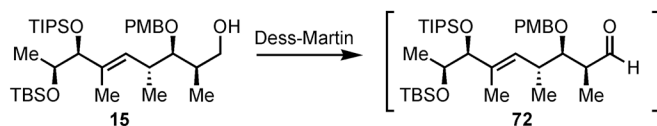

**(*E*)-(2*R*,3*R*,4*R*,8*S*)-1,8-di(*tert*-butyldimethylsilanyloxy)-3-(*p*-methoxybenzyloxy)-2,4,6-trimethylnon-5-ene-1-al, 72.** To a stirring solution of **15** (20 mg, 0.032 mmol) in dichloromethane (0.64 mL, reagent grade from a bottle) at 0 °C was added 1,1,1-triacetoxy-1,1-dihydro-1,2-benziodoxol-3-(1*H*)-one (27 mg, 0.064 mmol) at once. The reaction was stirred at 0 °C for 1 h and at room temperature for 30 min before diluting with a solution of 20 % EtOAc/ hexanes (2 mL). Most of the solvent was removed. The residue was dissolved in 5 mL of EtOAc/ hexanes and washed with a 1:1 mixture of 10 %  $\text{Na}_2\text{S}_2\text{O}_3$  and sat  $\text{NaHCO}_3$  until a clear organic layer was obtained. The organic layer was then washed with brine and dried over anhydrous  $\text{MgSO}_4$ . Crude aldehyde **72**, obtained after solvent removal, was further dried by azeotropic removal of water (concentration 3  $\times$  from anhydrous benzene). The aldehyde was used in the subsequent experiment without further purification.

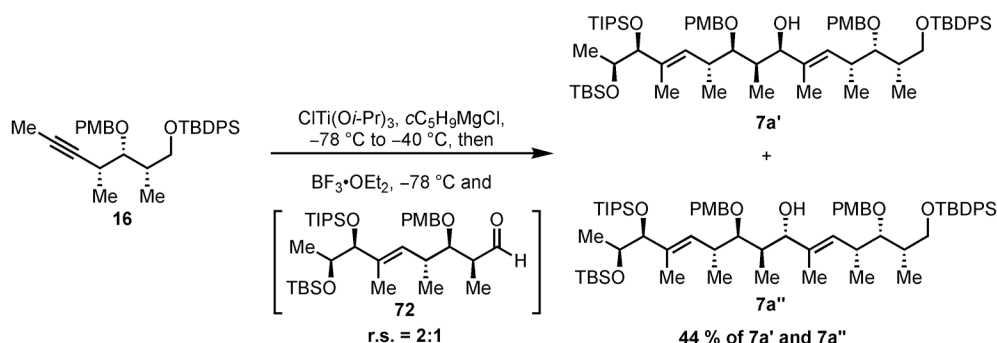

**Synthesis of diene 7a' and 7a'' via titanium reductive coupling.** To a  $-78$  °C solution of alkyne **16** (50 mg, 0.097 mmol) in 0.97 mL of toluene, was added sequentially

$\text{ClTi}(\text{O}i\text{-Pr})_3$  (1.0 M in hexanes; 150  $\mu\text{L}$ , 0.150 mmol) and *c*- $\text{C}_5\text{H}_9\text{MgCl}$  (2.0 M in diethyl ether; 150  $\mu\text{L}$ , 0.300 mmol) in a dropwise manner via a dry gas-tight syringe. The resulting yellow solution was slowly warmed to  $-40\text{ }^\circ\text{C}$  and stirred for 2 h during which the reaction turned dark brown. The flask was then cooled to  $-78\text{ }^\circ\text{C}$  and  $\text{BF}_3\cdot\text{OEt}_2$  (18  $\mu\text{L}$ , 0.15 mmol) was added in a dropwise manner. Following a stirring period of 10 min at  $-78\text{ }^\circ\text{C}$ , aldehyde **72** (20 mg, 0.032 mmol) was then added as a solution in toluene (0.1 mL) down the side of the flask via a gas tight syringe. The transfer was quantitated with additional toluene ( $2 \times 0.1\text{ mL}$ ). Stirring was maintained for 1 h at  $-78\text{ }^\circ\text{C}$ , before the addition of saturated  $\text{NH}_4\text{Cl}$  solution (0.3 mL). The suspension was allowed to reach ambient temperature before partitioning between EtOAc (5 mL) and water (3 mL). The phases were separated and the aqueous layer was extracted with EtOAc ( $3 \times 5\text{ mL}$ ). The combined organic layer was then washed with sat.  $\text{NaHCO}_3$  solution ( $2 \times 10\text{ mL}$ ), brine ( $1 \times 10\text{ mL}$ ) and dried over anhydrous  $\text{Na}_2\text{SO}_4$ . The crude material was purified by flash column chromatography eluting successively with 2 %, 3 %, 5 %, 7 %, 10 % and 15 % EtOAc/ hexanes to provide 16 mg (44 %) of **7a'** and **7a''** as the major regioisomer. Compound **7a'** was obtained as an inseparable mixture with some of the minor regioisomer. The amount of this minor contaminant was determined from analysis of the  $^1\text{H}$  spectrum and was not included in the yield reported.

**Regioselectivity data for 7a' and 7a''.** The residue obtained after a titanium reductive coupling as described above was filtered through a short pad of silica eluting successively with 2 % (50 mL) and 4 % (50 mL) EtOAc/ hexanes until all traces of reduced alkyne **16** were removed. All remaining organics were removed by washing the

silica with 200 mL of 100 % EtOAc. Analysis of the partially purified mixture by  $^1\text{H}$  NMR shows an approximately 2:1 mixture of regioisomers.

**Data for major diastereomer (*E,E*)-(2*S*,3*S*,4*R*,7*R*,8*R*,9*R*,10*R*,13*S*,14*S*)-1-(*tert*-butyldiphenylsilanyloxy)-3,9-di(*p*-methoxybenzyloxy)-13-(*tri*-isopropylsilanyloxy)-14-(*tert*-butyldimethylsilanyloxy)-2,4,6,8,10,12-hexamethylpentadec-5,11-diene-7-ol, 7a'.  $[\alpha]_{589}^{20} -13.4^\circ$  (*c* 0.7,  $\text{CHCl}_3$ );  $^1\text{H}$  NMR (500 MHz,  $\text{CDCl}_3$ )  $\delta$  7.66-7.63 (m, 4H), 7.44-7.32 (m, 6H), 7.31-7.29 (m, 2H), 7.23-7.21 (m, 2H), 6.88-6.82 (m, 4H), 5.60 (d,  $J = 9.6$  Hz, 1H), 5.34 (d,  $J = 10.1$  Hz, 1H), 4.77 (A of AB,  $J = 10.1$  Hz, 1H), 4.43 (B of AB,  $J = 10.1$  Hz, 1H), 4.54 (m, 2H), 4.17 (d,  $J = 3.8$  Hz, 1H), 4.09 (s, 1H), 3.95-3.89 (m, 1H), 3.81-3.75 (m, 5H), 3.64 (dd,  $J = 9.6$  Hz, 1H), 3.56-3.50 (m, 4H), 3.04-2.96 (m, 1H), 2.74-2.66 (m, 1H), 1.97-1.92 (m, 1H), 1.74 (s, 3H), 1.53 (s, 3H), 1.09 (d,  $J = 6.5$  Hz, 3H), 1.07-1.03 (m, 33H), 1.00 (d,  $J = 6.3$  Hz, 3H), 0.90-0.89 (m, 12H), 0.76 (d,  $J = 6.9$  Hz, 3H), 0.062 (s, 3H), 0.043 (s, 3H);  $^{13}\text{C}$  NMR (126 MHz,  $\text{CDCl}_3$ )  $\delta$  159.3, 159.2, 135.82, 135.79, 134.7, 134.6, 134.2, 134.1, 131.7, 131.1, 129.8, 129.5, 129.3, 127.9, 114.0, 113.9, 87.0, 83.4, 79.4, 79.2, 75.2, 73.1, 72.8, 66.9, 55.50, 55.48, 39.2, 37.8, 36.4, 35.3, 27.1, 26.1, 19.5, 18.41, 18.36, 18.2, 17.84, 17.77, 16.1, 14.1, 12.7, 10.8, 7.7, -4.36, -4.45; IR (thin film, NaCl) 3483, 2958, 2931, 2864, 1612, 1514, 1463, 1248, 1108, 1039, 842, 775, 701  $\text{cm}^{-1}$ ; LRMS (EI, Na) calcd for  $\text{C}_{68}\text{H}_{108}\text{O}_8\text{Si}_3$ , 1160.84  $m/z$  ( $\text{M} + \text{Na}$ ); observed, 1144.02 ( $\text{M} + \text{Na}$ ) $^+$   $m/z$ .**

**Data for minor diastereomer (*E,E*)-(2*S*,3*S*,4*R*,7*S*,8*R*,9*R*,10*R*,13*S*,14*S*)-1-(*tert*-butyldiphenylsilanyloxy)-3,9-di(*p*-methoxybenzyloxy)-13-(*tri*-isopropylsilanyloxy)-14-(*tert*-butyldimethylsilanyloxy)-2,4,6,8,10,12-hexamethylpentadec-5,11-diene-7-ol, 7a''.  $[\alpha]_{589}^{20} +4.42^\circ$  (*c* 0.6,  $\text{CHCl}_3$ );  $^1\text{H}$  NMR (500 MHz,  $\text{CDCl}_3$ )  $\delta$  7.66-7.63 (m, 4H),**

7.42-7.35 (m, 6H), 7.28-7.27 (m, 2H), 7.21-7.19 (m, 2H), 6.84-6.83 (m, 4H), 5.68 (d,  $J = 9.4$  Hz, 1H), 5.21 (d,  $J = 10.0$  Hz, 1H), 4.66-4.54 (m, 4H), 4.17 (d,  $J = 3.9$  Hz, 1H), 3.94-3.91 (m, 2H), 3.80 (s, 3H), 3.79 (s, 3H), 3.66-3.62 (m, 2H), 3.53-3.50 (m, 2H), 2.87-2.83 (m, 1H), 2.74-2.65 (m, 1H), 2.00-1.91 (m, 1H), 1.74 (s, 3H), 1.60 (s, 3H), 1.10 (d,  $J = 6.7$  Hz, 3H), 1.08-1.05 (m, 27H), 1.02 (d,  $J = 6.3$  Hz, 3H), 0.98 (d,  $J = 6.9$  Hz, 3H), 0.89 (m, 12H), 0.83 (d,  $J = 7.0$  Hz, 3H), 0.78 (d,  $J = 6.9$  Hz, 3H), 0.059 (s, 3H), 0.041 (s, 3H);  $^{13}\text{C}$  NMR (126 MHz,  $\text{CDCl}_3$ )  $\delta$  159.24, 159.17, 135.8, 135.7, 134.2, 133.98, 133.94, 131.7, 131.6, 129.81, 129.79, 129.4, 129.3, 127.9, 113.94, 113.89, 83.3, 80.8, 79.4, 75.2, 73.2, 73.1, 66.8, 55.50, 55.46, 39.2, 37.7, 36.3, 35.3, 27.1, 26.1, 19.5, 19.0, 18.4, 18.3, 18.2, 17.9, 15.7, 12.7, 12.3, 11.3, 10.5, -4.31, -4.42; IR (thin film, NaCl) 3487, 2930, 2863, 1613, 1514, 1463, 1248, 1108, 1039, 883, 825, 701, 668  $\text{cm}^{-1}$ ; LRMS (EI, Na) calcd for  $\text{C}_{68}\text{H}_{108}\text{O}_8\text{Si}_3$ , 1160.87  $m/z$  ( $\text{M} + \text{Na}$ ); observed, 1144.16 ( $\text{M} + \text{Na}$ ) $^+$   $m/z$ .

**Table 1.** The role of a tethered free hydroxyl in titanium alkoxide-mediated reductive coupling reactions.

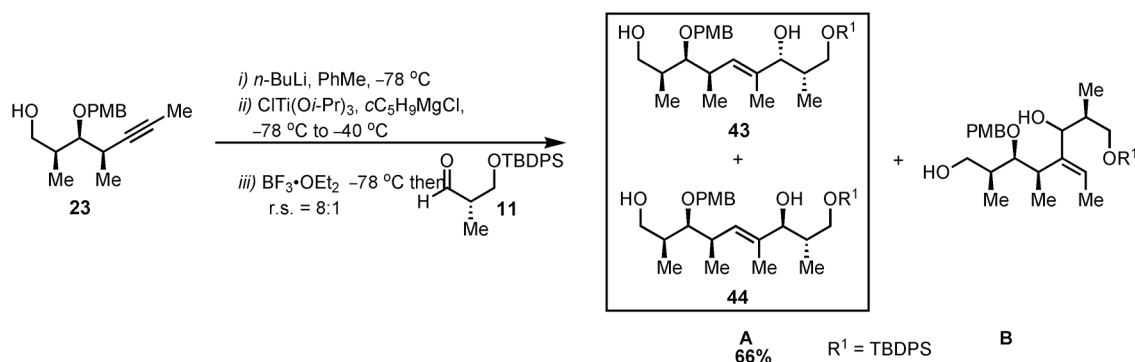

**Entry 1 - synthesis of ene-diol 43 and 44.** To a  $-78\text{ }^\circ\text{C}$  solution of alkyne **23** (20 mg, 0.072 mmol) in 0.72 mL of toluene, was added sequentially,  $n\text{-BuLi}$  (2.27 M in hexanes; 35  $\mu\text{L}$ , 0.080 mmol),  $\text{ClTi}(\text{O}i\text{-Pr})_3$  (1.0 M in hexanes; 160  $\mu\text{L}$ , 0.16 mmol) and

*c*-C<sub>5</sub>H<sub>9</sub>MgCl (2.0 M in diethyl ether; 160  $\mu$ L, 0.32 mmol) in a dropwise manner via a dry gas-tight syringe. The resulting yellow solution was slowly warmed to  $-40$   $^{\circ}$ C and stirred for 2 h during which the reaction turned dark brown. The flask was then cooled to  $-78$   $^{\circ}$ C and BF<sub>3</sub>•OEt<sub>2</sub> (29  $\mu$ L, 0.23 mmol) was added in a dropwise manner. Following a stirring period of 10 min at  $-78$   $^{\circ}$ C, aldehyde **11** (76 mg, 0.23 mmol) was added as a solution in toluene (0.2 mL) down the side of the flask via a gas tight syringe. The transfer was quantitated with additional toluene (2  $\times$  0.1 mL). Stirring was maintained for 1 h at  $-78$   $^{\circ}$ C, before the addition of saturated NH<sub>4</sub>Cl solution (0.4 mL). The suspension was allowed to reach ambient temperature before partitioning between EtOAc (5 mL) and water (3 mL). The phases were separated and the aqueous layer was extracted with EtOAc (3  $\times$  5 mL). The combined organic layer was then washed with sat. NaHCO<sub>3</sub> solution (2  $\times$  10 mL), brine (1  $\times$  10 mL) and dried over anhydrous Na<sub>2</sub>SO<sub>4</sub>. The crude material was purified by flash column chromatography eluting successively with 5 % (100 mL), 7% (50 mL), 10 % (100 mL), 15 % (50 mL), 20 % (100 mL) and 30 % (200 mL) EtOAc/ hexanes to provide 29 mg (66 %) of **43** and **44** as the major regioisomer **A**. Compound **44** was obtained with a small amount (10%) of the minor regioisomer as contaminant. The amount of this contaminant was included in the yield reported.

**Entry 1 - Regioselectivity data A:B.** The residue obtained after a titanium reductive coupling using the above procedure was filtered through a short pad of silica eluting successively with 5 % (50 mL), 7 % (50 mL), 10 % (50 mL) and 15 % (50 mL) EtOAc/ hexanes until all traces of the partially reduced olefinic product of alkyne **23** were removed. All remaining organics were removed by washing the silica with 200 mL

of 100 % EtOAc. Analysis of the partially purified mixture by  $^1\text{H}$  NMR shows an approximately 8:1 mixture of regioisomers.

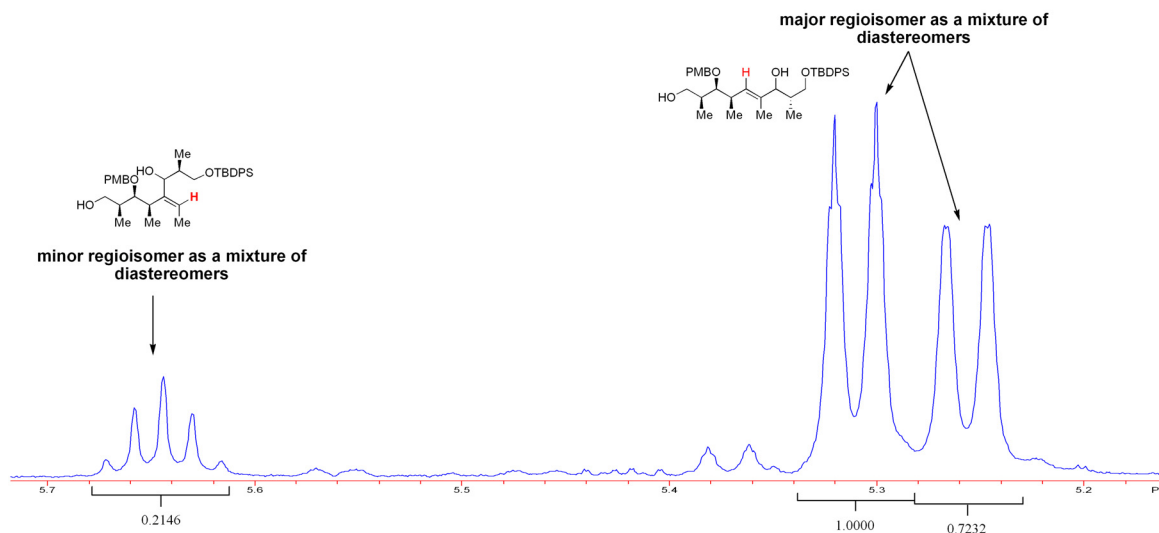

**Data for major diastereomer (*E*)-(2*S*,3*R*,6*R*,7*S*,8*S*)-1-(*tert*-butyldiphenylsilyloxy)-7-(*p*-methoxybenzyloxy)-2,4,6,8-tetramethylnon-4-ene-3,9-diol, 43.**  $[\alpha]_{589}^{20} +16.8^\circ$  ( $c$  1.2,  $\text{CHCl}_3$ );  $^1\text{H}$  NMR (500 MHz,  $\text{CDCl}_3$ )  $\delta$  7.69-7.67 (m, 4H), 7.47-7.39 (m, 6H), 7.31-7.28 (m, 2H), 6.90-6.88 (m, 2H), 5.31 (d,  $J = 10.1$  Hz, 1H), 4.62 (A of AB,  $J = 10.8$  Hz, 1 H), 4.52 (B of AB,  $J = 10.8$  Hz, 1 H), 4.22 (s, 1 H), 3.81 (s, 3H), 3.72-3.64 (m, 2H), 3.58-3.57 (m, 2H), 3.43-3.41 (m, 1H), 2.76-2.68 (m, 1H), 2.65 (s br, 1H), 1.93-1.83 (m, 2H), 1.62 (s br, 1H), 1.57 (s, 3H), 1.08 (s, 9H), 1.06 (d,  $J = 6.6$  Hz, 3H), 0.89 (d,  $J = 7.1$  Hz, 3H), 0.88 (d,  $J = 7.0$  Hz, 3H);  $^{13}\text{C}$  NMR (126 MHz,  $\text{CDCl}_3$ )  $\delta$  159.4, 135.89, 135.83, 134.8, 133.5, 133.3, 131.2, 130.01, 129.96, 129.6, 128.3, 127.96, 127.95, 114.0, 84.4, 77.9, 74.9, 68.4, 66.6, 55.5, 38.8, 37.8, 36.2, 27.1, 19.4, 19.1, 13.6, 10.8, 10.6; IR (thin film, NaCl) 3396, 2962, 2931, 2859, 1613, 1514, 1472, 1428, 1249, 1113, 1089, 1033, 824, 739, 702  $\text{cm}^{-1}$ ; LRMS (EI, Na) calcd for  $\text{C}_{37}\text{H}_{52}\text{O}_5\text{Si}$ , 627.89  $m/z$  ( $\text{M} + \text{Na}$ ); observed, 627.55 ( $\text{M} + \text{Na}$ ) $^+$   $m/z$ .



**Data for minor diastereomer (*E*)-(2*S*,3*S*,6*R*,7*S*,8*S*)-1-(*tert*-butyldiphenylsilyloxy)-7-(*p*-methoxybenzyloxy)-2,4,6,8-tetramethylnon-4-ene-3,9-diol, 44.**  $[\alpha]_{589}^{20} +20.3^\circ$  ( $c$  0.23,  $\text{CHCl}_3$ );  $^1\text{H}$  NMR (500 MHz,  $\text{CDCl}_3$ )  $\delta$  7.70-7.69 (m, 4H), 7.46-7.41 (m, 6H), 7.30-7.29 (m, 2H), 6.89-6.88 (m, 2H), 5.25 (d,  $J = 9.9$  Hz, 1H), 4.60 (A of AB,  $J = 10.8$  Hz, 1 H), 4.54 (B of AB,  $J = 10.8$  Hz, 1 H), 4.00 (s br, 1 H), 3.91 (d,  $J = 8.6$  Hz, 1H), 3.81 (s, 3H), 3.79 (dd,  $J = 13.1, 6.9$  Hz, 1H), 3.67-3.63 (m, 1H), 3.59-3.53 (m, 2H), 3.41 (d,  $J = 9.1$  Hz, 1H), 2.77-2.72 (m, 1H), 2.00-1.94 (m, 1H), 1.88-1.82 (m, 1H), 1.67 (s, 3H), 1.13 (d,  $J = 6.6$  Hz, 3H), 1.08 (s, 9H), 0.86 (d,  $J = 7.0$  Hz, 3H), 0.65 (d,  $J = 6.9$  Hz, 3H);  $^{13}\text{C}$  NMR (126 MHz,  $\text{CDCl}_3$ )  $\delta$  159.4, 135.84, 135.83, 135.4, 132.9, 131.6, 131.2, 130.1, 129.6, 128.0, 84.2, 84.1, 77.8, 74.9, 69.6, 66.5, 55.5, 38.8, 37.8, 36.3, 27.0, 19.3, 18.3, 13.8, 11.3, 10.8; IR (thin film, NaCl) 3422, 2959, 2931, 2857, 1612, 1514, 1463, 1428, 1248, 1036, 823, 741  $\text{cm}^{-1}$ ; LRMS (EI, Na) calcd for  $\text{C}_{37}\text{H}_{52}\text{O}_5\text{Si}$ , 627.89  $m/z$  ( $\text{M} + \text{Na}$ ); observed, 627.51 ( $\text{M} + \text{Na}$ ) $^+ m/z$ .

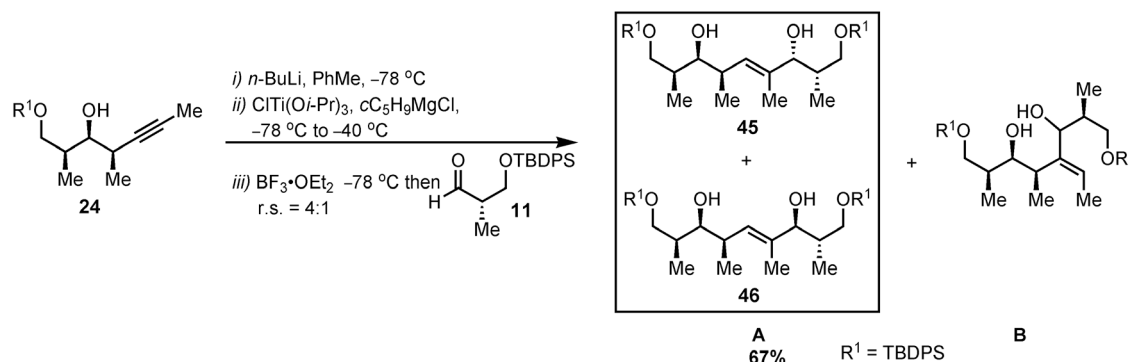

**Entry 2 - synthesis of ene-1,5-diol 45 and 46.** To a  $-78^\circ\text{C}$  solution of alkyne 47 (30 mg, 0.076 mmol) in 0.76 mL of toluene, was added sequentially,  $n\text{-BuLi}$  (2.27 M in hexanes; 37  $\mu\text{L}$ , 0.084 mmol),  $\text{ClTi}(\text{O}i\text{-Pr})_3$  (1.0 M in hexanes; 170  $\mu\text{L}$ , 0.17 mmol) and  $c\text{-C}_5\text{H}_9\text{MgCl}$  (2.0 M in diethyl ether; 170  $\mu\text{L}$ , 0.34 mmol) in a dropwise manner via a dry gas-tight syringe. The resulting yellow solution was slowly warmed to  $-40^\circ\text{C}$  and stirred

for 2 h during which the reaction turned dark brown. The flask was then cooled to  $-78\text{ }^{\circ}\text{C}$  and  $\text{BF}_3\cdot\text{OEt}_2$  (31  $\mu\text{L}$ , 0.24 mmol) was added in a dropwise manner. Following a stirring period of 10 min at  $-78\text{ }^{\circ}\text{C}$ , aldehyde **11** (79 mg, 0.24 mmol) was then added as a solution in toluene (0.2 mL) down the side of the flask via a gas tight syringe. The transfer was completed with additional toluene ( $2 \times 0.1\text{ mL}$ ). Stirring was maintained for 1 h at  $-78\text{ }^{\circ}\text{C}$ , before the addition of saturated  $\text{NH}_4\text{Cl}$  solution (0.4 mL). The suspension was allowed to reach ambient temperature before partitioning between EtOAc (5 mL) and water (3 mL). The phases were separated and the aqueous layer was extracted with EtOAc ( $3 \times 5\text{ mL}$ ). The combined organic layer was then washed with sat.  $\text{NaHCO}_3$  solution ( $2 \times 10\text{ mL}$ ), brine ( $1 \times 10\text{ mL}$ ) and dried over anhydrous  $\text{Na}_2\text{SO}_4$ . The crude material was purified by flash column chromatography eluting successively with 2 % (100 mL), 4 % (100 mL), 7 % (50 mL), 10 % (50 mL), 15 % (100 mL) and 20 % (100 mL) EtOAc/ hexanes to provide 37 mg (67 %) of **45** and **46** as the major regioisomer **A**.

**Entry 2 - Regioselectivity data A:B.** The residue obtained after a titanium reductive coupling using the above procedure was filtered through a short pad of silica eluting successively with 2 % (100 mL), 4 % (50 mL) and 6 % (50 mL) EtOAc/ hexanes until all traces of the partially reduced olefinic product of alkyne **24** were removed. All remaining organics were removed by washing the silica with 200 mL of 100 % EtOAc. Analysis of the partially purified mixture by  $^1\text{H}$  NMR shows an approximately 4:1 mixture of regioisomers.

**Data for major diastereomer (*E*)-(2*S*,3*R*,6*R*,7*S*,8*S*)-1,9-di(*tert*-butyldiphenylsilanyloxy)-2,4,6,8-tetramethylnon-4-ene-3,7-diol, **45**.**  $[\alpha]_{589}^{20} +9.3\text{ }^{\circ}$  ( $c$  0.84,  $\text{CHCl}_3$ );  $^1\text{H}$  NMR (500 MHz,  $\text{CDCl}_3$ )  $\delta$  7.68-7.67 (m, 8H), 7.44-7.30 (m, 12H), 5.24

(d,  $J = 10.1$  Hz, 1H), 4.23 (d,  $J = 3.0$  Hz, 1H), 3.81 (dd,  $J = 10.2, 3.7$  Hz, 1H), 3.72-3.63 (m, 4H), 2.59-2.51 (m, 1H), 1.87-1.82 (m, 1H), 1.80-1.73 (m, 1H), 1.61 (s, 3H), 1.075 (s, 9H), 1.068 (s, 9H), 1.05 (d,  $J = 6.6$  Hz, 3H), 0.93 (d,  $J = 7.1$  Hz, 3H), 0.82 (d,  $J = 7.0$  Hz, 3H);  $^{13}\text{C}$  NMR (126 MHz,  $\text{CDCl}_3$ )  $\delta$  136.0, 135.89, 135.85, 135.8, 135.1, 133.5, 133.4, 133.2, 130.1, 130.01, 129.98, 128.00, 127.97, 127.96, 127.94, 127.88, 127.7, 78.8, 77.7, 70.0, 68.4, 37.7, 37.2, 36.5, 27.13, 27.11, 19.43, 19.42, 18.0, 13.8, 10.4, 9.6; IR (thin film, NaCl) 3471, 2959, 2930, 2858, 1472, 1427, 1113, 998, 823, 740, 701, 614  $\text{cm}^{-1}$ ; LRMS (EI, Na) calcd for  $\text{C}_{45}\text{H}_{62}\text{O}_4 \text{Si}_2$ , 746.14  $m/z$  ( $\text{M} + \text{Na}$ ); observed, 746.72 ( $\text{M} + \text{Na}$ ) $^+$   $m/z$ .

**Data for minor diastereomer (*E*)-(2*S*,3*S*,6*R*,7*S*,8*S*)-1,9-di(*tert*-butyldiphenylsilanyloxy)-2,4,6,8-tetramethylnon-4-ene-3,7-diol, 46.**  $[\alpha]_{589}^{20} +12.5^\circ$  ( $c$  1.3,  $\text{CHCl}_3$ );  $^1\text{H}$  NMR (500 MHz,  $\text{CDCl}_3$ )  $\delta$  7.69-7.65 (m, 8H), 7.49-7.380 (m, 12H), 5.13 (d,  $J = 10.1$  Hz, 1H), 3.87 (d,  $J = 8.7$  Hz, 1H), 3.78-3.76 (m, 2H), 3.67-3.61 (m, 3H), 2.60-2.52 (m, 1H), 1.98-1.93 (m, 1H), 1.72-1.63 (m, 1H), 1.67 (s, 3H), 1.11 (d,  $J = 6.5$  Hz, 3H), 1.07 (s, 18H), 0.91 (d,  $J = 7.0$  Hz, 3H), 0.59 (d,  $J = 7.2$  Hz, 3H);  $^{13}\text{C}$  NMR (126 MHz,  $\text{CDCl}_3$ )  $\delta$  135.9, 135.83, 135.8, 135.6, 133.3, 133.1, 133.94, 132.92, 131.3, 130.11, 130.10, 130.06, 130.01, 128.00, 127.98, 127.97, 84.2, 78.6, 69.8, 69.6, 37.6, 37.3, 36.6, 27.1, 27.01, 19.4, 19.3, 17.0, 13.7, 11.3, 9.5; IR (thin film, NaCl) 3472, 2958, 2930, 2857, 1427, 1112, 740, 701  $\text{cm}^{-1}$ ; LRMS (EI, Na) calcd for  $\text{C}_{45}\text{H}_{62}\text{O}_4 \text{Si}_2$ , 746.14  $m/z$  ( $\text{M} + \text{Na}$ ); observed, 746.63 ( $\text{M} + \text{Na}$ ) $^+$   $m/z$ .

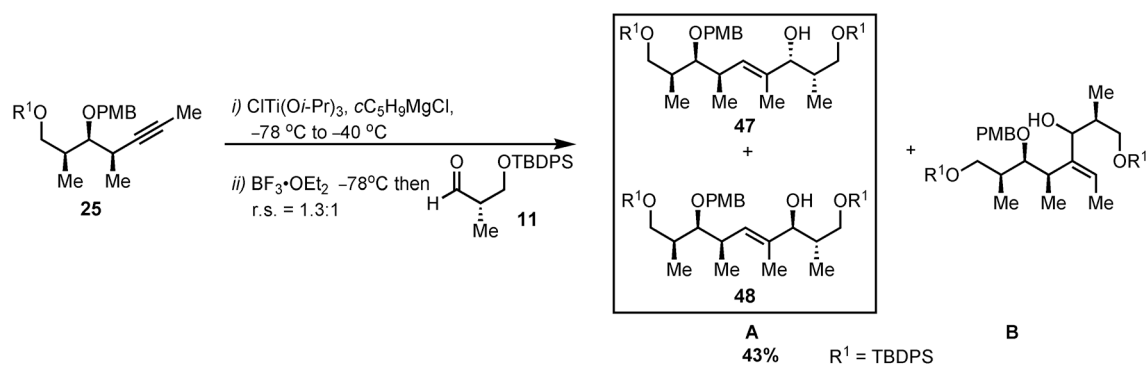

**Entry 3 - synthesis of enol **47** and **48**.** To a  $-78\text{ }^\circ\text{C}$  solution of alkyne **25** (35 mg, 0.068 mmol) in 0.68 mL of toluene, was added sequentially,  $\text{ClTi}(\text{O}i\text{-Pr})_3$  (1.0 M in hexanes; 150  $\mu\text{L}$ , 0.15 mmol) and  $c\text{-C}_5\text{H}_9\text{MgCl}$  (2.0 M in diethyl ether; 150  $\mu\text{L}$ , 0.30 mmol) in a dropwise manner via a dry gas-tight syringe. The resulting yellow solution was slowly warmed to  $-40\text{ }^\circ\text{C}$  and stirred for 2 h during which the reaction turned dark brown. The flask was then cooled to  $-78\text{ }^\circ\text{C}$  and  $\text{BF}_3 \cdot \text{OEt}_2$  (19  $\mu\text{L}$ , 0.15 mmol) was added in a dropwise manner. Following a stirring period of 10 min at  $-78\text{ }^\circ\text{C}$ , aldehyde **11** (71 mg, 0.22 mmol) was then added as a solution in toluene (0.2 mL) down the side of the flask via a gas tight syringe. The transfer was completed with additional toluene ( $2 \times 0.1\text{ mL}$ ). Stirring was maintained for 1 h at  $-78\text{ }^\circ\text{C}$ , before the addition of saturated  $\text{NH}_4\text{Cl}$  solution (0.4 mL). The suspension was allowed to reach ambient temperature before partitioning between EtOAc (5 mL) and water (3 mL). The phases were separated and the aqueous layer was extracted with EtOAc ( $3 \times 5\text{ mL}$ ). The combined organic layer was then washed with sat.  $\text{NaHCO}_3$  solution ( $2 \times 10\text{ mL}$ ), brine ( $1 \times 10\text{ mL}$ ) and dried over anhydrous  $\text{Na}_2\text{SO}_4$ . The crude material was purified by flash column chromatography eluting successively with 2 % (100 mL), 4 % (100 mL), 7 % (100 mL), 10 % (50 mL), 15 % (100 mL) and 20 % (100 mL) EtOAc/ hexanes to provide 24 mg (43 %) of **47** and **48** as the major regioisomer **A**.

**Entry 3 - Regioselectivity data A:B.** The residue obtained after a titanium reductive coupling using the above procedure was filtered through a short pad of silica eluting successively with 2 % (100 mL) and 4 % (50 mL) EtOAc/ hexanes until all traces of the partially reduced olefinic product of alkyne **25** were removed. All remaining organics were removed by washing the silica with 200 mL of 100 % EtOAc. Analysis of the partially purified mixture by  $^1\text{H}$  NMR shows an approximately 1.3:1 mixture of regioisomers.

**Data for major diastereomer (*E*)-(2*S*,3*R*,6*R*,7*S*,8*S*)-1,9-di(*tert*-butyldiphenylsilanyloxy)-7-(*p*-methoxybenzyloxy)-2,4,6,8-tetramethylnon-4-ene-3,7-diol, **47**.**  $[\alpha]_{589}^{20} +9.21^\circ$  (*c* 0.89,  $\text{CHCl}_3$ );  $^1\text{H}$  NMR (500 MHz,  $\text{CDCl}_3$ )  $\delta$  7.68-7.66 (m, 8H), 7.42-7.38 (m, 12H), 7.22-7.20 (m, 2H), 6.85-6.83 (m, 2H), 5.33 (d,  $J = 10.1$  Hz, 1H), 4.54 (s, 2H), 4.23 (s, 1H), 3.80 (s, 3H), 3.74-3.61 (m, 3H), 3.57-3.51 (m, 2H), 2.72-2.65 (m, 1H), 1.98-1.91 (m, 1H), 1.90-1.82 (m, 1H), 1.57 (s, 3H), 1.09 (s, 9H), 1.06 (s, 9H), 1.05 (d,  $J = 6.7$  Hz, 3H), 0.91 (d,  $J = 6.8$  Hz, 3H), 0.78 (d,  $J = 6.8$  Hz, 3H);  $^{13}\text{C}$  NMR (126 MHz,  $\text{CDCl}_3$ )  $\delta$  159.2, 135.9, 135.84, 135.82, 135.80, 134.7, 134.2, 134.1, 133.6, 133.4, 131.7, 130.00, 129.97, 129.8, 129.5, 128.4, 127.96, 127.95, 127.87, 127.85, 113.9, 83.3, 77.9, 75.2, 68.4, 66.9, 55.5, 39.2, 37.8, 36.3, 27.15, 27.12, 19.51, 19.46, 18.3, 13.7, 10.5, 10.4; IR (thin film, NaCl) 3496, 2962, 2859, 1427, 1248, 1112, 740, 701  $\text{cm}^{-1}$ ; LRMS (EI, Na) calcd for  $\text{C}_{53}\text{H}_{70}\text{O}_5\text{Si}_2$ , 866.29  $m/z$  ( $\text{M} + \text{Na}$ ); observed, 866.72 ( $\text{M} + \text{Na}$ ) $^+ m/z$ .

**Data for minor diastereomer (*E*)-(2*S*,3*S*,6*R*,7*S*,8*S*)-1,9-di(*tert*-butyldiphenylsilanyloxy)-7-(*p*-methoxybenzyloxy)-2,4,6,8-tetramethylnon-4-ene-3,7-diol, **48**.**  $[\alpha]_{589}^{20} +19.6^\circ$  (*c* 0.7,  $\text{CHCl}_3$ );  $^1\text{H}$  NMR (500 MHz,  $\text{CDCl}_3$ )  $\delta$  7.72-7.63 (m,

8H), 7.45-7.33 (m, 12H), 7.22-7.20 (m, 2H), 6.85-6.84 (m, 2H), 5.22 (d,  $J = 10.0$  Hz, 1H), 4.55 (s, 2H), 3.98, (s, 1H), 3.92 (d,  $J = 8.9$  Hz, 1H), 3.80 (s, 3H), 3.70-3.62 (m, 2H), 3.55-3.49 (m, 2H), 2.74-2.68 (m, 1H), 2.01-1.93 (m, 1H), 1.91-1.84 (m, 1H), 1.66 (s, 3H), 1.12(d,  $J = 6.5$  Hz, 3H ), 1.08 (s, 9H), 1.06 (s, 9H), 0.76 (d,  $J = 6.8$  Hz, 3H), 0.62 (d,  $J = 6.9$  Hz, 3H);  $^{13}\text{C}$  NMR (126 MHz,  $\text{CDCl}_3$ )  $\delta$  159.2, 135.85, 135.78, 135.74, 135.2, 134.1, 133.03, 132.99, 132.1, 131.6, 130.1, 129.80, 129.78, 129.4, 128.05, 128.04, 127.9, 127.8, 113.9, 84.4, 83.2, 75.3, 69.8, 66.8, 55.5, 39.2, 37.8, 36.3, 27.1, 27.0, 19.5, 19.3, 18.3, 13.7, 11.1, 10.4; IR (thin film, NaCl) 3492, 2960, 2931, 2858, 1514, 1472, 1428, 1248, 1112, 1038, 823, 740, 701, 614  $\text{cm}^{-1}$ ; LRMS (EI, Na) calcd for  $\text{C}_{53}\text{H}_{70}\text{O}_5 \text{Si}_2$ , 866.29  $m/z$  ( $\text{M} + \text{Na}$ ); observed, 866.72 ( $\text{M} + \text{Na}$ ) $^+$   $m/z$ .

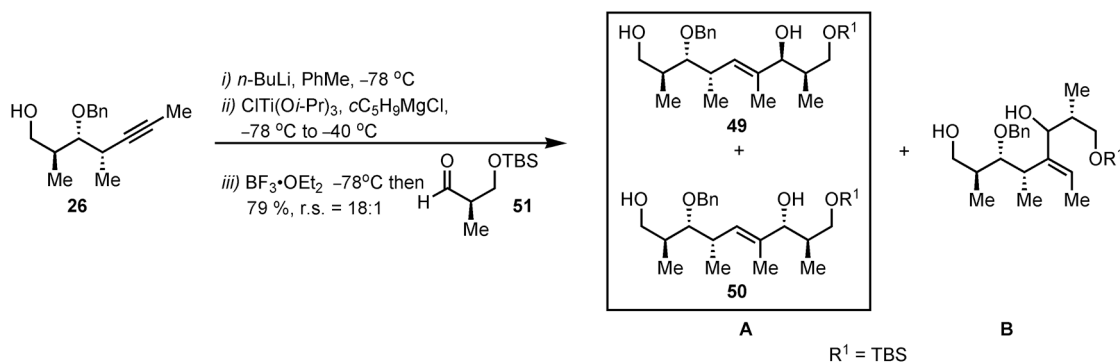

**Entry 4 - synthesis of ene-diol **49** and **50**.** To a  $-78^\circ\text{C}$  solution of alkyne **26** (20 mg, 0.081 mmol) in 0.81 mL of toluene, was added sequentially, *n*-BuLi (2.27 M in hexanes; 39  $\mu\text{L}$ , 0.089 mmol),  $\text{CITi}(\text{O}i\text{-Pr})_3$  (1.0 M in hexanes; 180  $\mu\text{L}$ , 0.18 mmol) and *c*- $\text{C}_5\text{H}_9\text{MgCl}$  (2.0 M in diethyl ether; 180  $\mu\text{L}$ , 0.36 mmol) in a dropwise manner via a dry gas-tight syringe. The resulting yellow solution was slowly warmed to  $-40^\circ\text{C}$  and stirred for 2 h during which the reaction turned dark brown. The flask was then cooled to  $-78^\circ\text{C}$  and  $\text{BF}_3 \cdot \text{OEt}_2$  (33  $\mu\text{L}$ , 0.260 mmol) was added in a dropwise manner. Following a stirring period of 10 min at  $-78^\circ\text{C}$ , aldehyde **51** (53 mg, 0.26 mmol) was then added as a

solution in toluene (0.2 mL) down the side of the flask via a gas tight syringe. The transfer was completed with additional toluene ( $2 \times 0.1$  mL). Stirring was maintained for 1 h at  $-78$  °C, before the addition of saturated  $\text{NH}_4\text{Cl}$  solution (0.4 mL). The suspension was allowed to reach ambient temperature before partitioning between EtOAc (5 mL) and water (3 mL). The phases were separated and the aqueous layer was extracted with EtOAc ( $3 \times 5$  mL). The combined organic layer was then washed with sat.  $\text{NaHCO}_3$  solution ( $2 \times 10$  mL), brine ( $1 \times 10$  mL) and dried over anhydrous  $\text{Na}_2\text{SO}_4$ . The crude material was purified by flash column chromatography eluting successively with 5 % (100 mL), 7% (50 mL), 10 % (100 mL), 15 % (50 mL), 20 % (100 mL) and 30 % (200 mL) EtOAc/ hexanes to provide 29 mg (79 %) of an inseparable mixture of regioisomers **A** and **B**.

**Entry 4 - Regioselectivity data A:B.** The residue obtained after a titanium reductive coupling using the above procedure was filtered through a short pad of silica eluting successively with 5 % (100 mL), 7 % (50 mL), 10 % (50 mL) and 15 % (50 mL) EtOAc/ hexanes until all traces of the partially reduced olefinic product of alkyne **26** were removed. All remaining organics were removed by washing the silica with 200 mL of 100 % EtOAc. Analysis of the partially purified mixture by  $^1\text{H}$  NMR shows an approximately 18:1 mixture of regioisomers.

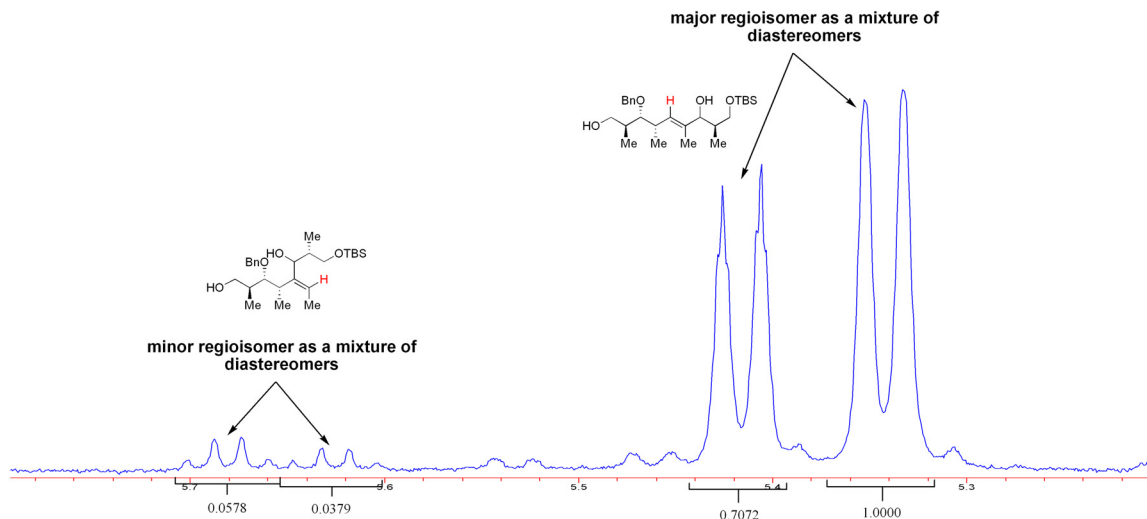

**Data for major diastereomer (*E*)-(2*R*,3*S*,6*S*,7*R*,8*S*)-1-(*tert*-butyldimethylsilanyloxy)-7-(benzyloxy)-2,4,6,8-tetramethylnon-4-ene-3,9-diol, 49.**  $[\alpha]_{589}^{20} -22.3^\circ$  ( $c$  1.37,  $\text{CHCl}_3$ );  $^1\text{H}$  NMR (500 MHz,  $\text{CDCl}_3$ )  $\delta$  7.37-7.29 (m, 5H), 5.34 (d,  $J = 9.8$  Hz, 1H), 4.66 (A of AB,  $J = 10.8$  Hz, 1 H), 4.59 (B of AB,  $J = 10.8$  Hz, 1 H), 4.14 (s br, 1 H), 3.85 (d,  $J = 8.2$  Hz, 1H), 3.81-3.76 (m, 2H), 3.62-3.54 (m, 2H), 3.27 (dd,  $J = 6.5, 5.1$  Hz, 1H), 2.85-2.77 (m, 1H), 2.76-2.60 (s br, 1H), 1.94-1.83 (m, 2H), 1.66 (d,  $J = 0.73$  Hz, 3H), 1.11 (d,  $J = 6.7$  Hz, 3H), 1.09 (d,  $J = 7.2$  Hz, 3H), 0.92 (s, 9H), 0.71 (d,  $J = 7.0$  Hz, 3H), 0.10 (s, 6H);  $^{13}\text{C}$  NMR (126 MHz,  $\text{CDCl}_3$ )  $\delta$  138.4, 135.9, 131.4, 128.7, 128.05, 127.98, 89.9, 84.2, 76.0, 68.9, 65.7, 37.7, 37.5, 36.3, 26.0, 18.3, 16.8, 16.0, 13.9, 11.7, -5.4, -5.5; IR (thin film, NaCl) 3425, 2958, 2929, 2858, 1471, 1456, 1253, 1089, 1005, 836, 777, 697  $\text{cm}^{-1}$ ; LRMS (EI, Na) calcd for  $\text{C}_{26}\text{H}_{46}\text{O}_4\text{Si}$ , 473.73  $m/z$  ( $\text{M} + \text{Na}$ ); observed, 473.49 ( $\text{M} + \text{Na}$ ) $^+$   $m/z$ .

**Data for minor diastereomer (*E*)-(2*R*,3*R*,6*S*,7*R*,8*S*)-1-(*tert*-butyldimethylsilanyloxy)-7-(benzyloxy)-2,4,6,8-tetramethylnon-4-ene-3,9-diol, 50.**  $[\alpha]_{589}^{20} -17.7^\circ$  ( $c$  0.9,  $\text{CHCl}_3$ );  $^1\text{H}$  NMR (500 MHz,  $\text{CDCl}_3$ )  $\delta$  7.36-7.29 (m, 5H), 5.42 (d,



$J = 9.9$  Hz, 1H), 4.68 (A of AB,  $J = 10.8$  Hz, 1 H), 4.61 (B of AB,  $J = 10.8$  Hz, 1 H), 4.19 (s, 1 H), 3.80 (d,  $J = 10.8$  Hz, 1H), 3.76 (dd,  $J = 9.9$ , 4.0 Hz, 1H), 3.68 (dd,  $J = 9.8$ , 4.6 Hz, 1H), 3.55-3.53 (m, 1H), 3.30 (dd,  $J = 7.1$ , 4.6 Hz, 1H), 3.07 (s br, 1H), 2.85-2.78 (m, 1H), 2.75 (s br, 1H), 1.93-1.82 (m, 2H), 1.60 (s, 3H), 1.11 (d,  $J = 2.65$  Hz, 3H), 1.10 (d,  $J = 2.15$  Hz, 3H), 0.92 (s, 9H), 0.84 (d,  $J = 7.0$  Hz, 3H), 0.085 (s, 3H), 0.080 (s, 3H);  $^{13}\text{C}$  NMR (126 MHz,  $\text{CDCl}_3$ )  $\delta$  138.4, 135.0, 128.7, 128.07, 128.05, 90.2, 78.3, 76.2, 68.3, 65.6, 37.6, 37.4, 36.5, 26.1, 18.4, 17.1, 16.1, 14.0, 10.3, -5.35, -5.39; IR (thin film, NaCl) 3410, 2957, 2929, 2857, 1471, 1454, 1256, 1094, 1028, 836, 777, 698  $\text{cm}^{-1}$ ; LRMS (EI, Na) calcd for  $\text{C}_{26}\text{H}_{46}\text{O}_4\text{Si}$ , 473.73  $m/z$  ( $\text{M} + \text{Na}$ ); observed, 473.49 ( $\text{M} + \text{Na}$ ) $^+$   $m/z$ .

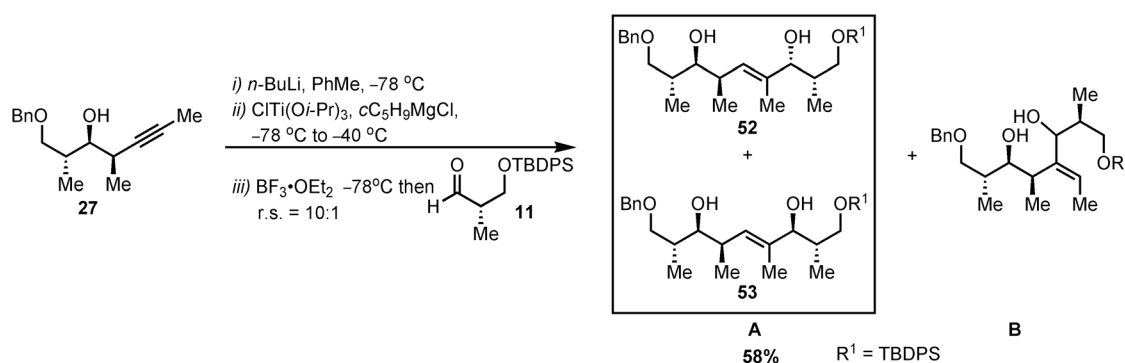

**Entry 5 - synthesis of ene-1,5-diol **52** and **53**.** To a  $-78$  °C solution of alkyne **27** (20 mg, 0.081 mmol) in 0.81 mL of toluene, was added sequentially,  $n$ -BuLi (2.27 M in hexanes; 39  $\mu\text{L}$ , 0.089 mmol),  $\text{ClTi}(\text{O}i\text{-Pr})_3$  (1.0 M in hexanes; 180  $\mu\text{L}$ , 0.18 mmol) and  $c\text{-C}_5\text{H}_9\text{MgCl}$  (2.0 M in diethyl ether; 180  $\mu\text{L}$ , 0.36 mmol) in a dropwise manner via a dry gas-tight syringe. The resulting yellow solution was slowly warmed to  $-40$  °C and stirred for 2 h during which the reaction turned dark brown. The flask was then cooled to  $-78$  °C and  $\text{BF}_3 \cdot \text{OEt}_2$  (33  $\mu\text{L}$ , 0.26 mmol) was added in a dropwise manner. Following a stirring period of 10 min at  $-78$  °C, aldehyde **11** (85 mg, 0.26 mmol) was then added as a

solution in toluene (0.2 mL) down the side of the flask via a gas tight syringe. The transfer was completed with additional toluene ( $2 \times 0.1$  mL). Stirring was maintained for 1 h at  $-78$  °C, before the addition of saturated  $\text{NH}_4\text{Cl}$  solution (0.4 mL). The suspension was allowed to reach ambient temperature before partitioning between EtOAc (5 mL) and water (3 mL). The phases were separated and the aqueous layer was extracted with EtOAc ( $3 \times 5$  mL). The combined organic layer was then washed with sat.  $\text{NaHCO}_3$  solution ( $2 \times 10$  mL), brine ( $1 \times 10$  mL) and dried over anhydrous  $\text{Na}_2\text{SO}_4$ . The crude material was purified by flash column chromatography eluting successively with 2 % (100 mL), 4 % (100 mL), 7 % (50 mL), 10 % (50 mL), 15 % (100 mL) and 20 % (200 mL) EtOAc/ hexanes to provide 27mg (58 %) of **52** and **53** as the major regioisomer **A**.

**Entry 5 - Regioselectivity data A:B.** The residue obtained after a titanium reductive coupling using the above procedure was filtered through a short pad of silica eluting successively with 2 % (100 mL), 4 % (50 mL) and 6 % (50 mL) EtOAc/ hexanes until all traces of the partially reduced olefinic product alkyne **27** were removed. All remaining organics were removed by washing the silica with 200 mL of 100 % EtOAc. Analysis of the partially purified mixture by  $^1\text{H}$  NMR shows an approximately 10:1 mixture of regioisomers.

**Data for (*E*)-(2*R*,3*S*,6*R*,7*S*,8*R*)-1,9-di(benzyloxy)-2,4,6,8-tetramethylnon-4-ene-3,7-diol, 52.**  $[\alpha]_{589}^{20} +29.6^\circ$  ( $c$  0.73,  $\text{CHCl}_3$ );  $^1\text{H}$  NMR (500 MHz,  $\text{CDCl}_3$ )  $\delta$  7.70-7.68 (m, 4H), 7.68-7.28 (m, 11H), 5.33 (d,  $J = 9.6$  Hz, 1H), 4.53 (A of AB,  $J = 12.0$  Hz, 1 H), 4.48 (B of AB,  $J = 12.0$  Hz, 1 H), 3.91-3.90 (m, 2H), 3.78 (dd,  $J = 10.1, 4.1$  Hz, 1H), 3.64 (dd,  $J = 10.1, 7.9$  Hz, 1H), 3.61 (dd,  $J = 9.2, 4.2$  Hz, 1H), 3.43 (dd,  $J = 9.0, 5.2$  Hz, 1H), 3.28 (dd,  $J = 12.0, 6.0$  Hz, 1H), 3.03 (d,  $J = 6.1$  Hz, 1H), 2.55-2.48 (m, 1H),

1.97-1.82 (m, 2H), 1.58 (d,  $J = 1.1$  Hz, 3H), 1.07 (s, 9H), 1.06 (d,  $J = 2.3$  Hz, 3H), 1.04 (d,  $J = 2.8$  Hz, 3H), 0.63 (d,  $J = 6.9$  Hz, 3H);  $^{13}\text{C}$  NMR (126 MHz,  $\text{CDCl}_3$ )  $\delta$  138.0, 135.8, 135.0, 133.0, 131.9, 130.1, 128.7, 128.02, 127.96, 83.9, 80.2, 74.1, 73.8, 69.5, 37.7, 36.5, 36.0, 27.0, 19.3, 15.9, 15.4, 13.9, 11.3; IR (thin film, NaCl) 3451, 2959, 2858, 1428, 1112, 1078, 822, 739, 701, 613  $\text{cm}^{-1}$ ; LRMS (EI, Na) calcd for  $\text{C}_{36}\text{H}_{50}\text{O}_4\text{Si}$ , 597.87  $m/z$  ( $\text{M} + \text{Na}$ ); observed, 597.50 ( $\text{M} + \text{Na}$ ) $^+$   $m/z$ .

**Data for (*E*)-(2*S*,3*R*,6*R*,7*S*,8*R*)-1,9-di(benzyloxy)-2,4,6,8-tetramethylnon-4-ene-3,7-diol, 53.**  $[\alpha]_{589}^{20} +15.6^\circ$  ( $c$  1.05,  $\text{CHCl}_3$ );  $^1\text{H}$  NMR (500 MHz,  $\text{CDCl}_3$ )  $\delta$  7.68-7.66 (m, 4H), 7.46-7.36 (m, 6H), 7.36-7.28 (m, 5H), 5.36 (d,  $J = 9.7$  Hz, 1H), 4.53 (A of AB,  $J = 12.0$  Hz, 1 H), 4.48 (B of AB,  $J = 12.0$  Hz, 1 H), 4.17 (d,  $J = 3.9$  Hz, 1H), 3.64 (dd,  $J = 5.0, 2.6$  Hz, 1H), 3.61 (dd,  $J = 9.0, 4.1$  Hz, 1H), 3.43 (dd,  $J = 9.1, 5.0$  Hz, 1H), 3.31 (dd,  $J = 11.8, 5.8$  Hz, 1H), 3.01 (d,  $J = 6.0$  Hz, 1H), 2.53-2.45 (m, 2H), 1.93-1.81 (m, 2H), 1.47 (d,  $J = 0.94$  Hz, 3H), 1.07 (s, 9H), 1.06 (d,  $J = 7.2$  Hz, 3H), 0.98 (d,  $J = 6.7$  Hz, 3H), 0.87 (d,  $J = 6.9$  Hz, 3H);  $^{13}\text{C}$  NMR (126 MHz,  $\text{CDCl}_3$ )  $\delta$  138.1, 135.9, 135.8, 134.7, 133.6, 133.5, 129.96, 129.93, 128.9, 128.7, 128.00, 127.96, 127.93, 127.92, 80.2, 78.1, 74.0, 73.8, 68.0, 38.0, 36.5, 35.9, 27.1, 19.3, 16.0, 15.5, 13.3, 10.9; IR (thin film, NaCl) 3440, 2960, 2930, 2858, 1454, 1428, 1112, 1089, 1006, 823, 739, 701, 614  $\text{cm}^{-1}$ ; LRMS (EI, Na) calcd for  $\text{C}_{36}\text{H}_{50}\text{O}_4\text{Si}$ , 597.87  $m/z$  ( $\text{M} + \text{Na}$ ); observed, 597.50 ( $\text{M} + \text{Na}$ ) $^+$   $m/z$ .

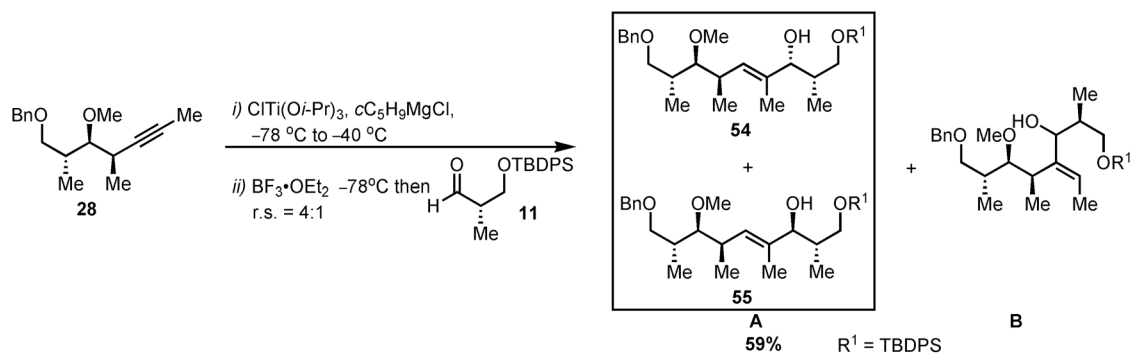

**Entry 6 - synthesis of allylic alcohols **54** and **55**.** To a  $-78\text{ }^\circ\text{C}$  solution of alkyne **28** (20 mg, 0.075 mmol) in 0.75 mL of toluene, was added sequentially,  $\text{ClTi}(\text{O}i\text{-Pr})_3$  (1.0 M in hexanes; 170  $\mu\text{L}$ , 0.17 mmol) and  $c\text{-C}_5\text{H}_9\text{MgCl}$  (2.0 M in diethyl ether; 170  $\mu\text{L}$ , 0.34 mmol) in a dropwise manner via a dry gas-tight syringe. The resulting yellow solution was slowly warmed to  $-40\text{ }^\circ\text{C}$  and stirred for 2 h during which the reaction turned dark brown. The flask was then cooled to  $-78\text{ }^\circ\text{C}$  and  $\text{BF}_3 \cdot \text{OEt}_2$  (21  $\mu\text{L}$ , 0.17 mmol) was added in a dropwise manner. Following a stirring period of 10 min at  $-78\text{ }^\circ\text{C}$ , aldehyde **11** (78 mg, 0.24 mmol) was then added as a solution in toluene (0.2 mL) down the side of the flask via a gas tight syringe. The transfer was completed with additional toluene ( $2 \times 0.1\text{ mL}$ ). Stirring was maintained for 1 h at  $-78\text{ }^\circ\text{C}$ , before the addition of saturated  $\text{NH}_4\text{Cl}$  solution (0.4 mL). The suspension was allowed to reach ambient temperature before partitioning between EtOAc (5 mL) and water (3 mL). The phases were separated and the aqueous layer was extracted with EtOAc ( $3 \times 5\text{ mL}$ ). The combined organic layer was then washed with sat.  $\text{NaHCO}_3$  solution ( $2 \times 10\text{ mL}$ ), brine ( $1 \times 10\text{ mL}$ ) and dried over anhydrous  $\text{Na}_2\text{SO}_4$ . The crude material was purified by flash column chromatography eluting successively with 2 % (100 mL), 4 % (100 mL), 7 % (100 mL), 10 % (50 mL), 15 % (100 mL) and 20 % (200 mL) EtOAc/ hexanes to provide

26 mg (59 %) of **54** and **55** as the major regioisomer **A**. Compound **54** was contaminated with an impurity. This contaminant was not included in the yield.

**Entry 6 - Regioselectivity data A:B.** The residue obtained after a titanium reductive coupling using the above procedure was filtered through a short pad of silica eluting successively with 2 % (50 mL) and 4 % (50 mL) EtOAc/ hexanes until all traces of the partially reduced product of alkyne **28** were removed. All remaining organics were removed by washing the silica with 200 mL of 100 % EtOAc. Analysis of the partially purified mixture by  $^1\text{H}$  NMR shows an approximately 4:1 mixture of regioisomers.

**Entry 6 – Characterization data for 54.** Due to contamination of allylic alcohol **54** with an unidentified impurity, characterization was performed on diol **56** obtained after a TBAF deprotection.

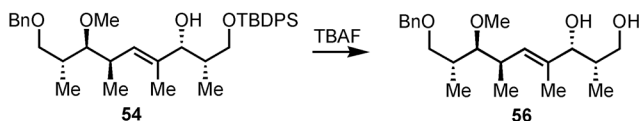

**Data for diol 56.**  $[\alpha]_{589}^{20} +12.5^\circ$  (*c* 0.36,  $\text{CHCl}_3$ );  $^1\text{H}$  NMR (500 MHz,  $\text{CDCl}_3$ )  $\delta$  7.36-7.28 (m, 5H), 5.37 (d,  $J = 9.6$  Hz, 1H), 4.51 (A of AB,  $J = 12.1$  Hz, 1 H), 4.47 (B of AB,  $J = 12.1$  Hz, 1 H), 4.09 (d,  $J = 4.6$  Hz, 1H), 3.66 (d,  $J = 5.1$  Hz, 2H), 3.54 (dd,  $J = 8.9, 4.1$  Hz, 1H), 3.44 (s, 3H), 3.39 (dd,  $J = 7.5, 7.5$  Hz, 1H), 2.94 (dd,  $J = 2.9, 2.9$  Hz, 1H), 2.69-2.62 (m, 1H), 2.00-1.94 (m, 1H), 1.94-1.86 (m, 1H), 1.81 (s br, 2H), 1.56 (s, 3H), 1.05 (d,  $J = 6.9$  Hz, 3H), 0.98 (d,  $J = 6.7$  Hz, 3H), 0.92 (d,  $J = 7.0$  Hz, 3H);  $^{13}\text{C}$  NMR (126 MHz,  $\text{CDCl}_3$ )  $\delta$  139.0, 135.2, 129.4, 128.5, 127.9, 127.7, 88.1, 79.1, 73.3, 72.3, 67.1, 61.6, 38.0, 37.1, 35.2, 16.1, 15.7, 13.4, 11.1; IR (thin film, NaCl) 3395, 2965, 2925, 2875, 1454, 1453, 1110, 1086, 1028, 734, 695  $\text{cm}^{-1}$ ; LRMS (EI, Na) calcd for  $\text{C}_{21}\text{H}_{34}\text{O}_4$ , 373.49  $m/z$  ( $\text{M} + \text{Na}$ ); observed, 373.40 ( $\text{M} + \text{Na}$ ) $^+$   $m/z$ .

**Data for minor diastereomer (*E*)-(2*S*,3*S*,6*R*,7*S*,8*S*)-11-(*tert*-butyldiphenylsilyloxy)-7-(methoxy)- 9-(benzyloxy)--2,4,6,8-tetramethylnon-4-ene-3-ol, **55**.**  $[\alpha]_{589}^{20} +14.8^\circ$  ( $c$  1.01,  $\text{CHCl}_3$ );  $^1\text{H}$  NMR (500 MHz,  $\text{CDCl}_3$ )  $\delta$  7.71-7.69 (m, 4H), 7.48-7.40 (m, 6H), 7.34-7.31 (m, 5H), 5.34 (d,  $J = 9.9$  Hz, 1H), 4.49 (A of AB,  $J = 12.1$  Hz, 1 H), 4.48 (B of AB,  $J = 12.1$  Hz, 1 H), 3.93 (s, 1H), 3.90 (d,  $J = 8.6$  Hz, 1H), 3.79 (dd,  $J = 4.0, 10.1$  Hz, 1H), 3.65 (dd,  $J = 7.9, 10.0$  Hz, 1H), 3.53 (dd,  $J = 8.9, 4.1$  Hz, 1H), 3.41 (s, 3H), 3.38-3.35 (m, 1H), 2.90 (dd,  $J = 5.9, 5.9$  Hz, 1H), 2.68-2.60 (m, 1H), 1.99-1.90 (m, 2H), 1.60 (d,  $J = 1.1$  Hz, 3H), 1.08 (s, 9H), 1.04 (d,  $J = 6.9$  Hz, 3H), 1.00 (d,  $J = 6.7$  Hz, 3H), 0.66 (d,  $J = 6.9$  Hz, 3H);  $^{13}\text{C}$  NMR (126 MHz,  $\text{CDCl}_3$ )  $\delta$  139.0, 135.84, 135.83, 135.0, 133.0, 132.4, 130.1, 128.5, 128.0, 127.8, 127.6, 88.2, 84.1, 73.2, 72.3, 69.6, 61.5, 37.8, 37.1, 35.2, 27.1, 19.3, 16.0, 15.6, 13.8, 11.2; IR (thin film, NaCl) 3481, 2961, 2930, 2856, 1472, 1456, 1428, 1089, 1006, 739, 701  $\text{cm}^{-1}$ ; LRMS (EI, Na) calcd for  $\text{C}_{37}\text{H}_{52}\text{O}_4\text{Si}$ , 611.89  $m/z$  ( $\text{M} + \text{Na}$ ); observed, 611.47 ( $\text{M} + \text{Na}$ ) $^+$   $m/z$ .

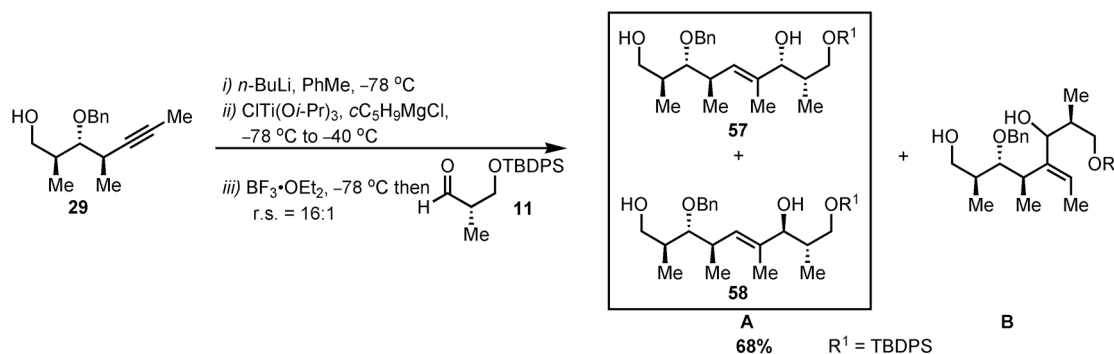

**Entry 7 – synt hesis of ene-diol **57** and **58**.** To a  $-78^\circ\text{C}$  solution of alkyne **29** (20 mg, 0.081 mmol) in 0.81 mL of toluene, was added sequentially,  $n\text{-BuLi}$  (2.27 M in hexanes; 39  $\mu\text{L}$ , 0.089 mmol),  $\text{ClTi}(\text{O}i\text{-Pr})_3$  (1.0 M in hexanes; 180  $\mu\text{L}$ , 0.18 mmol) and  $c\text{-C}_5\text{H}_9\text{MgCl}$  (2.0 M in diethyl ether; 180  $\mu\text{L}$ , 0.36 mmol) in a dropwise manner via a dry gas-tight syringe. The resulting yellow solution was slowly warmed to  $-40^\circ\text{C}$  and stirred

for 2 h during which the reaction turned dark brown. The flask was then cooled to  $-78\text{ }^{\circ}\text{C}$  and  $\text{BF}_3\cdot\text{OEt}_2$  (33  $\mu\text{L}$ , 0.26 mmol) was added in a dropwise manner. Following a stirring period of 10 min at  $-78\text{ }^{\circ}\text{C}$ , aldehyde **11** (85 mg, 0.26 mmol) was then added as a solution in toluene (0.2 mL) down the side of the flask via a gas tight syringe. The transfer was completed with additional toluene ( $2 \times 0.1\text{ mL}$ ). Stirring was maintained for 1 h at  $-78\text{ }^{\circ}\text{C}$ , before the addition of saturated  $\text{NH}_4\text{Cl}$  solution (0.4 mL). The suspension was allowed to reach ambient temperature before partitioning between EtOAc (5 mL) and water (3 mL). The phases were separated and the aqueous layer was extracted with EtOAc ( $3 \times 5\text{ mL}$ ). The combined organic layer was then washed with sat.  $\text{NaHCO}_3$  solution ( $2 \times 10\text{ mL}$ ), brine ( $1 \times 10\text{ mL}$ ) and dried over anhydrous  $\text{Na}_2\text{SO}_4$ . The crude material was purified by flash column chromatography eluting successively with 5 % (100 mL), 7 % (50 mL), 10 % (100 mL), 15 % (50 mL), 20 % (100 mL) and 30 % (200 mL) EtOAc/ hexanes to provide 32 mg (68 %) of diastereomers **57** and **58** as the major regioisomer **A**.

**Entry 7 - Regioselectivity data A:B.** The residue obtained after a titanium reductive coupling using the above procedure was filtered through a short pad of silica eluting successively with 5 % (100 mL), 7 % (50 mL), 10 % (50 mL) and 15 % (50 mL) EtOAc/ hexanes until all traces of the partially reduced olefinic product alkyne **29** were removed. All remaining organics were removed by washing the silica with 200 mL of 100 % EtOAc. Analysis of the partially purified mixture by  $^1\text{H}$  NMR shows an approximately 16:1 mixture of regioisomers.

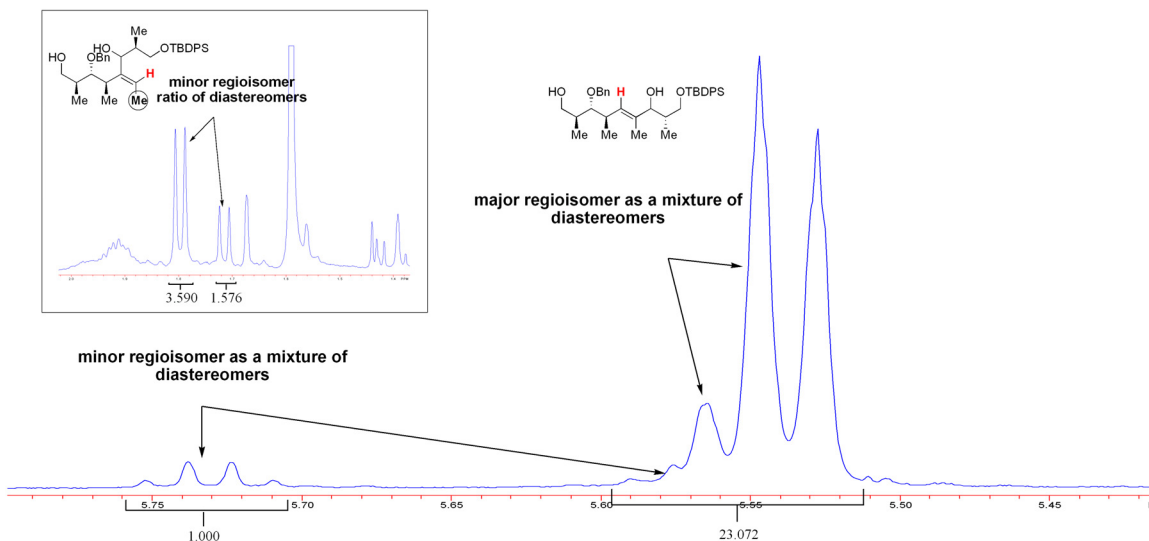

**Data for major diastereomer (*E*)-(2*S*,3*R*,6*R*,7*R*,8*S*)-1-(*tert*-butyldimethylsilyloxy)-7-(benzyloxy)-2,4,6,8-tetramethylnon-4-ene-3,9-diol, 57.**

$[\alpha]_{589}^{20} -8.1^\circ$  (*c* 3.3,  $\text{CHCl}_3$ );  $^1\text{H}$  NMR (500 MHz,  $\text{CDCl}_3$ )  $\delta$  7.69-7.67 (m, 4H), 7.44-7.28 (m, 11H), 5.54 (d,  $J = 9.7$  Hz, 1H), 4.72 (A of AB,  $J = 11.1$  Hz, 1H), 4.61 (B of AB,  $J = 11.1$  Hz, 1H), 4.80 (d,  $J = 4.4$  Hz, 1H), 3.71 (dd,  $J = 10.9, 3.6$  Hz, 1H), 3.66-3.61 (m, 3H), 3.31 (dd,  $J = 7.1, 4.1$  Hz, 1H), 2.83-2.76 (m, 1H), 2.47 (s br, 1H), 1.91-1.84 (m, 2H), 1.57 (s, 3H), 1.08 (s, 9H), 1.04 (d,  $J = 6.9$  Hz, 3H), 0.96 (d,  $J = 7.0$  Hz, 3H), 0.92 (d,  $J = 6.9$  Hz, 3H);  $^{13}\text{C}$  NMR (126 MHz,  $\text{CDCl}_3$ )  $\delta$  138.5, 135.98, 135.88, 135.80, 133.6, 133.5, 129.92, 129.89, 128.6, 127.93, 127.90, 127.34, 89.1, 78.3, 75.4, 68.0, 66.5, 38.2, 38.1, 35.7, 27.1, 19.4, 18.3, 15.5, 13.3, 11.1; IR (thin film, NaCl) 3422, 2961, 2930, 2859, 1473, 1456, 1362, 1112, 999, 824, 739, 701, 614  $\text{cm}^{-1}$ ; LRMS (EI, Na) calcd for  $\text{C}_{36}\text{H}_{50}\text{O}_4\text{Si}$ , 597.87  $m/z$  ( $\text{M} + \text{Na}$ ); observed, 597.51 ( $\text{M} + \text{Na}$ ) $^+$   $m/z$ .

**Data for minor diastereomer (*E*)-(2*S*,3*S*,6*R*,7*R*,8*S*)-1-(*tert*-butyldimethylsilyloxy)-7-(benzyloxy)-2,4,6,8-tetramethylnon-4-ene-3,9-diol, 58.**



$[\alpha]_{589}^{20} -24.5^\circ$  ( $c$  0.69,  $\text{CHCl}_3$ );  $^1\text{H}$  NMR (500 MHz,  $\text{CDCl}_3$ )  $\delta$  7.70-7.68 (m, 4H), 7.42-7.30 (m, 11H), 5.55 (d,  $J = 9.3$  Hz, 1H), 4.73 (A of AB,  $J = 11.0$  Hz, 1 H), 4.61 (B of AB,  $J = 11.0$  Hz, 1 H), 3.96 (d,  $J = 8.7$  Hz, 1H), 3.78 (dd,  $J = 10.1, 4.1$  Hz, 1H), 3.68-3.61 (m, 3H), 3.31 (dd,  $J = 7.9, 3.5$  Hz, 1H), 2.84-2.77 (m, 1H), 2.00-1.92 (m, 1H), 1.83-1.78 (m, 1H), 1.68 (d,  $J = 1.1$  Hz, 3H), 1.15 (d,  $J = 7.0$  Hz, 3H), 1.07 (s, 9H), 0.91 (d,  $J = 7.0$  Hz, 3H), 0.63 (d,  $J = 6.9$  Hz, 3H);  $^{13}\text{C}$  NMR (126 MHz,  $\text{CDCl}_3$ )  $\delta$  138.5, 136.2, 135.8, 132.94, 132.92, 130.0, 128.7, 128.04, 128.02, 127.98, 127.95, 88.7, 84.4, 75.5, 70.0, 66.8, 38.7, 37.6, 35.7, 27.1, 19.3, 18.5, 15.2, 13.8, 11.2; IR (thin film, NaCl) 3440, 2960, 2929, 2858, 1471, 1454, 1428, 1112, 1028, 1006, 823, 738, 701, 614  $\text{cm}^{-1}$ ; LRMS (EI, Na) calcd for  $\text{C}_{36}\text{H}_{50}\text{O}_4$  Si, 597.87  $m/z$  ( $\text{M} + \text{Na}$ ); observed, 597.00 ( $\text{M} + \text{Na}$ ) $^+$   $m/z$ . observed, ( $\text{M} + \text{Na}$ ) $^+$   $m/z$ .

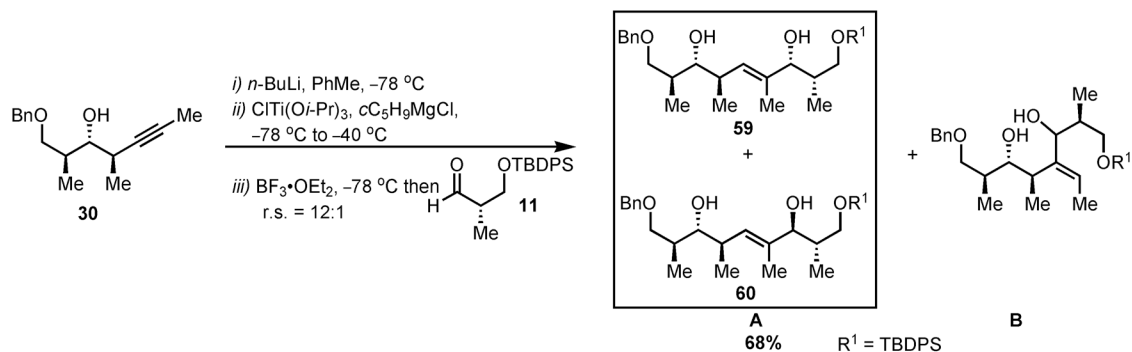

**Entry 8 - synthesis of ene-1,5-diol 59 and 60.** To a  $-78^\circ\text{C}$  solution of alkyne **30** (20 mg, 0.081 mmol) in 0.81 mL of toluene, was added sequentially,  $n\text{-BuLi}$  (2.27 M in hexanes; 39  $\mu\text{L}$ , 0.089 mmol),  $\text{ClTi}(\text{O}i\text{-Pr})_3$  (1.0 M in hexanes; 180  $\mu\text{L}$ , 0.18 mmol) and  $c\text{-C}_5\text{H}_9\text{MgCl}$  (2.0 M in diethyl ether; 180  $\mu\text{L}$ , 0.36 mmol) in a dropwise manner via a dry gas-tight syringe. The resulting yellow solution was slowly warmed to  $-40^\circ\text{C}$  and stirred for 2 h during which the reaction turned dark brown. The flask was then cooled to  $-78^\circ\text{C}$  and  $\text{BF}_3\cdot\text{OEt}_2$  (33  $\mu\text{L}$ , 0.26 mmol) was added in a dropwise manner. Following a stirring

period of 10 min at  $-78\text{ }^{\circ}\text{C}$ , aldehyde **11** (85 mg, 0.26 mmol) was then added as a solution in toluene (0.2 mL) down the side of the flask via a gas tight syringe. The transfer was completed with additional toluene ( $2 \times 0.1\text{ mL}$ ). Stirring was maintained for 1 h at  $-78\text{ }^{\circ}\text{C}$ , before the addition of saturated  $\text{NH}_4\text{Cl}$  solution (0.4 mL). The suspension was allowed to reach ambient temperature before partitioning between EtOAc (5 mL) and water (3 mL). The phases were separated and the aqueous layer was extracted with EtOAc ( $3 \times 5\text{ mL}$ ). The combined organic layer was then washed with sat.  $\text{NaHCO}_3$  solution ( $2 \times 10\text{ mL}$ ), brine ( $1 \times 10\text{ mL}$ ) and dried over anhydrous  $\text{Na}_2\text{SO}_4$ . The crude material was purified by flash column chromatography eluting successively with 2 % (100 mL), 4 % (100 mL), 7 % (50 mL), 10 % (50 mL), 15 % (100 mL) and 20 % (200 mL) EtOAc/ hexanes to provide 32 mg (68 %) of diastereomers **59** and **60** as the major regioisomer **A**.

**Entry 8 - Regioselectivity data A:B.** The residue obtained after a titanium reductive coupling using the above procedure was filtered through a short pad of silica eluting successively with 2 % (100 mL), 4 % (50 mL) and 6 % (50 mL) EtOAc/ hexanes until all traces of the partially reduced olefinic product alkyne **30** were removed. All remaining organics were removed by washing the silica with 200 mL of 100 % EtOAc. Analysis of the partially purified mixture by  $^1\text{H}$  NMR shows an approximately 12:1 mixture of regioisomers.

**Data for major diastereomer (*E*)-(2*R*,3*S*,6*R*,7*R*,8*S*)-1-(*tert*-butyldiphenylsilanyloxy)- 9-(benzyloxy)-2,4,6,8-tetramethylnon-4-ene-3,7-diol, **59**.**  
 $[\alpha]_{589}^{20} +13.8^{\circ}$  ( $c$  2.9,  $\text{CHCl}_3$ );  $^1\text{H}$  NMR (500 MHz,  $\text{CDCl}_3$ )  $\delta$  7.69-7.68 (m, 4H), 7.45-7.28 (m, 11H), 5.57 (d,  $J = 9.8\text{ Hz}$ , 1H), 4.55-4.50 (m, 2H), 4.21 (d,  $J = 4.0\text{ Hz}$ , 1H),

3.68-3.63 (m, 2H), 3.58 (dd,  $J = 9.2, 4.5$  Hz, 1H), 3.54-3.51 (m, 1H), 3.40 (dd,  $J = 7.5, 4.1$  Hz, 1H), 2.63-2.57 (m, 1H), 1.93-1.86 (m, 2H), 1.56 (s, 3H), 1.08 (s, 9H), 0.99 (d,  $J = 6.9$  Hz, 3H), 0.92 (d,  $J = 6.9$  Hz, 3H), 0.86 (d,  $J = 7.0$  Hz, 3H);  $^{13}\text{C}$  NMR (126 MHz,  $\text{CDCl}_3$ )  $\delta$  138.0, 136.1, 135.9, 135.8, 133.6, 133.5, 129.91, 129.89, 128.7, 127.94, 127.90, 127.89, 126.4, 80.3, 78.1, 75.5, 73.7, 68.0, 38.1, 36.6, 35.5, 27.1, 19.4, 18.0, 14.4, 13.5, 10.9; IR (thin film, NaCl) 3447, 2960, 2930, 2858, 1454, 1427, 1112, 1028, 824, 739, 701, 614  $\text{cm}^{-1}$ ; LRMS (EI, Na) calcd for  $\text{C}_{36}\text{H}_{50}\text{O}_4\text{Si}$ , 597.87  $m/z$  ( $\text{M} + \text{Na}$ ); observed, 597.52 ( $\text{M} + \text{Na}$ ) $^+$   $m/z$ .

**Data for minor diastereomer (*E*)-(2*R*,3*R*,6*R*,7*R*,8*S*)-1-(*tert*-butyldiphenylsilanyloxy)- 9-(benzyloxy)-2,4,6,8-tetramethylnon-4-ene-3,7-diol, 60.**

$[\alpha]_{589}^{20} +19.6^\circ$  ( $c$  1.31,  $\text{CHCl}_3$ );  $^1\text{H}$  NMR (500 MHz,  $\text{CDCl}_3$ )  $\delta$  7.71-7.70 (m, 4H), 7.48-7.40 (m, 6H), 7.36-7.28 (m, 5H), 5.54 (d,  $J = 9.7$  Hz, 1H), 4.52 (A of AB,  $J = 12.1$  Hz, 1H), 4.51 (B of AB,  $J = 12.1$  Hz, 1H), 3.97 (d,  $J = 8.9$  Hz, 1H), 3.79 (dd,  $J = 10.2, 4.2$  Hz, 1H), 3.67 (dd,  $J = 9.9, 8.3$  Hz, 1H), 3.57 (dd,  $J = 9.2, 4.2$  Hz, 1H), 3.50 (dd,  $J = 8.2, 8.2$  Hz, 1H), 3.41 (dd,  $J = 8.0, 3.7$  Hz, 1H), 2.64-2.58 (m, 1H), 2.01-1.92 (m, 1H), 1.88-1.79 (m, 1H), 1.67 (d,  $J = 0.8$  Hz, 3H), 1.09-1.07 (m, 12H), 0.82 (d,  $J = 7.0$  Hz, 3H), 0.65 (d,  $J = 6.9$  Hz, 3H);  $^{13}\text{C}$  NMR (126 MHz,  $\text{CDCl}_3$ )  $\delta$  137.9, 136.1, 135.8, 133.0, 130.1, 129.6, 129.7, 128.03, 128.01, 127.99, 127.92, 84.3, 80.4, 75.9, 73.7, 69.8, 37.6, 36.7, 35.5, 27.0, 19.4, 18.0, 14.1, 13.8, 11.1; IR (thin film, NaCl) 3469, 2960, 2929, 2858, 1454, 1428, 1113, 1087, 1005, 823, 739, 701, 615  $\text{cm}^{-1}$ ; LRMS (EI, Na) calcd for  $\text{C}_{36}\text{H}_{50}\text{O}_4\text{Si}$ , 597.87  $m/z$  ( $\text{M} + \text{Na}$ ); observed, 597.52 ( $\text{M} + \text{Na}$ ) $^+$   $m/z$ .

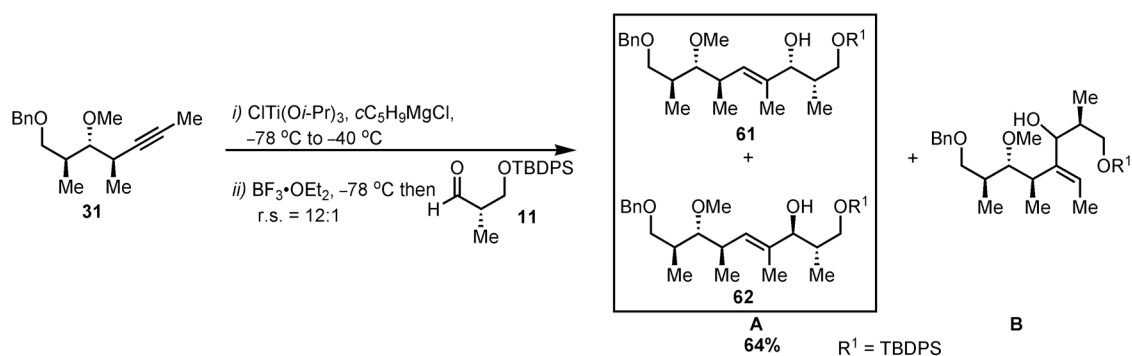

**Entry 9 - synthesis of enol **61** and **62**.** To a  $-78\text{ }^\circ\text{C}$  solution of alkyne **31** (20 mg, 0.075 mmol) in 0.75 mL of toluene, was added sequentially,  $\text{ClTi}(\text{O}i\text{-Pr})_3$  (1.0 M in hexanes; 170  $\mu\text{L}$ , 0.17 mmol) and  $c\text{-C}_5\text{H}_9\text{MgCl}$  (2.0 M in diethyl ether; 170  $\mu\text{L}$ , 0.34 mmol) in a dropwise manner via a dry gas-tight syringe. The resulting yellow solution was slowly warmed to  $-40\text{ }^\circ\text{C}$  and stirred for 2 h during which the reaction turned dark brown. The flask was then cooled to  $-78\text{ }^\circ\text{C}$  and  $\text{BF}_3 \cdot \text{OEt}_2$  (21  $\mu\text{L}$ , 0.17 mmol) was added in a dropwise manner. Following a stirring period of 10 min at  $-78\text{ }^\circ\text{C}$ , aldehyde **11** (78 mg, 0.24 mmol) was then added as a solution in toluene (0.2 mL) down the side of the flask via a gas tight syringe. The transfer was completed with additional toluene ( $2 \times 0.1\text{ mL}$ ). Stirring was maintained for 1 h at  $-78\text{ }^\circ\text{C}$ , before the addition of saturated  $\text{NH}_4\text{Cl}$  solution (0.4 mL). The suspension was allowed to reach ambient temperature before partitioning between EtOAc (5 mL) and water (3 mL). The phases were separated and the aqueous layer was extracted with EtOAc ( $3 \times 5\text{ mL}$ ). The combined organic layer was then washed with sat.  $\text{NaHCO}_3$  solution ( $2 \times 10\text{ mL}$ ), brine ( $1 \times 10\text{ mL}$ ) and dried over anhydrous  $\text{Na}_2\text{SO}_4$ . The crude material was purified by flash column chromatography eluting successively with 2 % (100 mL), 4 % (100 mL), 7 % (100 mL), 10 % (50 mL), 15 % (100 mL) and 20 % (200 mL) EtOAc/ hexanes to provide 29 mg (64 %) of **61** and **62** as the major regioisomer **A**.

**Entry 9 - Regioselectivity data A:B.** The residue obtained after a titanium reductive coupling using the above procedure was filtered through a short pad of silica eluting successively with 2 % (50 mL) and 4 % (50 mL) EtOAc/ hexanes until all traces of the partially reduce olefinic product alkyne **31** were removed. All remaining organics were removed by washing the silica with 200 mL of 100 % EtOAc. Analysis of the partially purified mixture by  $^1\text{H}$  NMR shows an approximately 10:1 mixture of regioisomers.

**Data for major diastereomer (*E*)-(2*S*,3*R*,6*R*,7*S*,8*S*)-1-(*tert*-butyldiphenylsilyloxy)-7-(methoxy)- 9-(benzyloxy)- 2,4,6,8-tetramethylnon-4-ene-3-ol, **61**.**  $[\alpha]_{589}^{20} +1.08^\circ$  (*c* 3.2,  $\text{CHCl}_3$ );  $^1\text{H}$  NMR (500 MHz,  $\text{CDCl}_3$ )  $\delta$  7.71-7.68 (m, 4H), 7.46-7.35 (m, 10H), 7.31-7.28 (m, 1H), 5.51 (d,  $J = 9.8$  Hz, 1H), 4.54-4.49 (m, 2H), 4.18 (d,  $J = 4.2$  Hz, 1H), 3.65-3.64 (m, 2H), 3.52-3.51 (m, 2H), 3.43 (s, 3H), 3.00 (dd,  $J = 8.2, 3.4$  Hz, 1H), 2.68-2.62 (m, 1H), 2.44-2.18 (s br, 1H), 1.90-1.80 (m, 2H), 1.54 (s, 3H), 1.08 (s, 9H), 0.99 (d,  $J = 6.9$  Hz, 3H), 0.95 (d,  $J = 6.9$  Hz, 3H), 0.92 (d,  $J = 6.9$  Hz, 3H);  $^{13}\text{C}$  NMR (126 MHz,  $\text{CDCl}_3$ )  $\delta$  139.0, 135.9, 135.81, 135.77, 135.3, 129.90, 129.88, 128.5, 128.1, 127.95, 127.90, 127.76, 127.61, 126.9, 87.5, 78.3, 73.2, 72.8, 68.1, 61.4, 38.1, 37.7, 35.0, 27.1, 19.4, 18.6, 15.1, 13.3, 11.0; IR (thin film, NaCl) 3465, 2961, 2930, 2858, 1471, 1428, 1362, 1112, 1008, 824, 739, 701, 614  $\text{cm}^{-1}$ ; LRMS (EI, Na) calcd for  $\text{C}_{37}\text{H}_{52}\text{O}_4\text{Si}$ , 611.89  $m/z$  ( $\text{M} + \text{Na}$ ); observed, 611.48 ( $\text{M} + \text{Na}$ ) $^+$   $m/z$ .

**Data for minor diastereomer (*E*)-(2*S*,3*S*,6*R*,7*S*,8*S*)-11-(*tert*-butyldiphenylsilyloxy)-7-(methoxy)- 9-(benzyloxy)--2,4,6,8-tetramethylnon-4-ene-3-ol, **62**.**  $[\alpha]_{589}^{20} +5.6^\circ$  (*c* 1.4,  $\text{CHCl}_3$ );  $^1\text{H}$  NMR (500 MHz,  $\text{CDCl}_3$ )  $\delta$  7.71-7.69 (m, 4H), 7.45-7.40 (m, 6H), 7.36-7.33 (m, 5H), 5.46 (d,  $J = 9.8$  Hz, 1H), 4.51 (A of AB,  $J = 12.2$

Hz, 1H), ), 4.49 (B of AB,  $J = 12.2$  Hz, 1H), 3.95 (d,  $J = 9.0$  Hz, 1H), 3.77 (dd,  $J = 10.1$ , 4.2 Hz, 1H), 3.65 (dd,  $J = 9.9$ , 7.8 Hz, 1H), 3.52 (dd,  $J = 8.9$ , 5.6 Hz, 1H), 3.48 (dd,  $J = 8.8$ , 3.6 Hz, 1H), 3.44 (s, 3H), 3.02 (dd,  $J = 6.8$ , 3.7 Hz, 1H), 2.71-2.64 (m, 1H), 2.00-1.93 (m, 1H), 1.77-1.71 (m, 1H), 1.65 (d,  $J = 0.7$  Hz, 3H), 1.09 (d,  $J = 7.0$  Hz, 3H), 1.07 (s, 9H), 0.93 (d,  $J = 6.9$  Hz, 3H), 0.62 (d,  $J = 6.9$  Hz, 3H);  $^{13}\text{C}$  NMR (126 MHz,  $\text{CDCl}_3$ )  $\delta$  139.0, 135.8, 135.7, 133.0, 130.1, 128.5, 128.03, 128.00, 127.7, 127.6, 87.3, 84.4, 73.2, 72.8, 69.9, 61.5, 38.0, 37.6, 35.1, 27.0, 19.3, 18.6, 14.9, 13.7, 10.9; IR (thin film, NaCl) 3490, 2960, 2930, 2858, 1454, 1428, 1362, 1112, 1094, 1006, 823, 739, 701, 614  $\text{cm}^{-1}$ ; LRMS (EI, Na) calcd for  $\text{C}_{37}\text{H}_{52}\text{O}_4\text{Si}$ , 611.89  $m/z$  ( $\text{M} + \text{Na}$ ); observed, 611.55 ( $\text{M} + \text{Na}$ ) $^+$   $m/z$ .

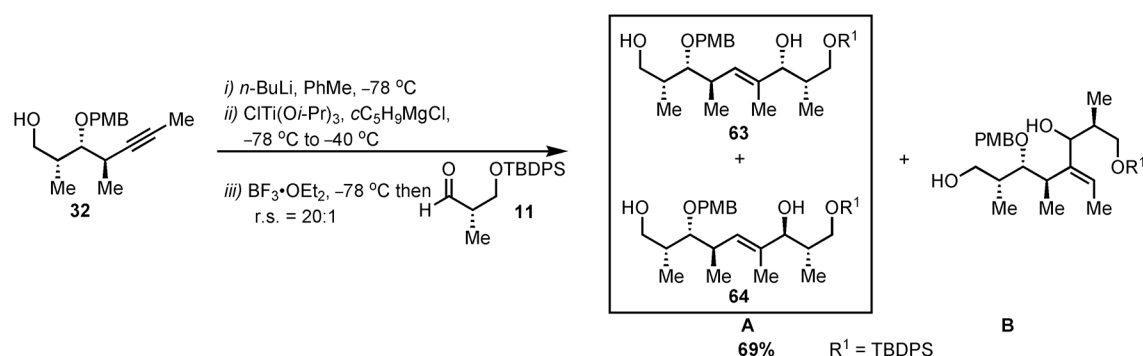

**Entry 10 - synthesis of ene-diol **63** and **64**.** To a  $-78^\circ\text{C}$  solution of alkyne **32** (20 mg, 0.072 mmol) in 0.72 mL of toluene, was added sequentially,  $n\text{-BuLi}$  (2.27 M in hexanes; 35  $\mu\text{L}$ , 0.080 mmol),  $\text{ClTi}(\text{O}i\text{-Pr})_3$  (1.0 M in hexanes; 160  $\mu\text{L}$ , 0.16 mmol) and  $c\text{-C}_5\text{H}_9\text{MgCl}$  (2.0 M in diethyl ether; 160  $\mu\text{L}$ , 0.32 mmol) in a dropwise manner via a dry gas-tight syringe. The resulting yellow solution was slowly warmed to  $-40^\circ\text{C}$  and stirred for 2 h during which the reaction turned dark brown. The flask was then cooled to  $-78^\circ\text{C}$  and  $\text{BF}_3 \cdot \text{OEt}_2$  (29  $\mu\text{L}$ , 0.23 mmol) was added in a dropwise manner. Following a stirring period of 10 min at  $-78^\circ\text{C}$ , aldehyde **11** (76 mg, 0.23 mmol) was then added as a

solution in toluene (0.2 mL) down the side of the flask via a gas tight syringe. The transfer was completed with additional toluene ( $2 \times 0.1$  mL). Stirring was maintained for 1 h at  $-78$  °C, before the addition of saturated  $\text{NH}_4\text{Cl}$  solution (0.4 mL). The suspension was allowed to reach ambient temperature before partitioning between EtOAc (5 mL) and water (3 mL). The phases were separated and the aqueous layer was extracted with EtOAc ( $3 \times 5$  mL). The combined organic layer was then washed with sat.  $\text{NaHCO}_3$  solution ( $2 \times 10$  mL), brine ( $1 \times 10$  mL) and dried over anhydrous  $\text{Na}_2\text{SO}_4$ . The crude material was purified by flash column chromatography eluting successively with 5 % (100 mL), 7% (50 mL), 10 % (100 mL), 15 % (50 mL), 20 % (100 mL) and 30 % (200 mL) EtOAc/ hexanes to provide 30 mg (69 %) of diastereomers **63** and **64** as the major regioisomer **A**.

**Entry 10 - Regioselectivity data A:B.** The residue obtained after a titanium reductive coupling using the above procedure was filtered through a short pad of silica eluting successively with 5 % (100 mL), 7 % (50 mL), 10 % (50 mL) and 15 % (50 mL) EtOAc/ hexanes until all traces of the partially reduced olefinic product of alkyne **32** were removed. All remaining organics were removed by washing the silica with 200 mL of 100 % EtOAc. Analysis of the partially purified mixture by  $^1\text{H}$  NMR shows an approximately 20:1 mixture of regioisomers.

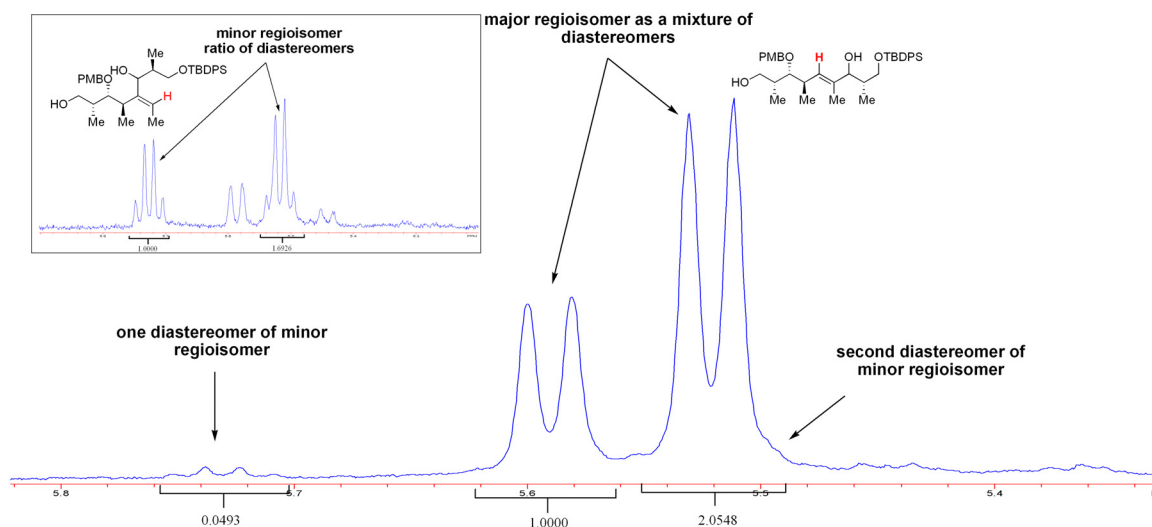

**Data for major diastereomer (*E*)-(2*S*,3*R*,6*R*,7*R*,8*R*)-1-(*tert*-butyldiphenylsilyloxy)-7-(*p*-methoxybenzyloxy)-2,4,6,8-tetramethylnon-4-ene-3,9-diol, **63**.**  $[\alpha]_{589}^{20} +1.31^\circ$  (*c* 2.8, CHCl<sub>3</sub>); <sup>1</sup>H NMR (500 MHz, CDCl<sub>3</sub>)  $\delta$  7.72-7.63 (m, 4H), 7.45-7.37 (m, 6H), 7.31-7.21 (m, 2H), 6.92-6.82 (m, 2H), 5.52 (d, *J* = 9.5 Hz, 1H), 4.58 (A of AB, *J* = 11.0 Hz, 1 H), 4.50 (B of AB, *J* = 11.0 Hz, 1 H), 4.12 (d, *J* = 6.2 Hz, 1H), 3.80 (s, 3H), 3.61-3.57 (m, 3H), 3.52 (dd, *J* = 10.5, 5.0 Hz, 1H), 3.41-3.39 (m, 1H), 2.78-2.72 (m, 1H), 2.00-1.93 (m, 1H), 1.90-1.82 (m, 1H), 1.57 (s, 3H), 1.08 (s, 9H), 0.96 (d, *J* = 6.9 Hz, 3H), 0.95 (d, *J* = 6.8 Hz, 3H), 0.92 (d, *J* = 6.8 Hz, 3H); <sup>13</sup>C NMR (126 MHz, CDCl<sub>3</sub>)  $\delta$  159.3, 135.9, 135.8, 135.5, 133.7, 133.6, 131.3, 129.91, 129.87, 129.4, 129.2, 127.9, 84.7, 78.7, 73.8, 67.9, 66.5, 55.5, 38.3, 37.9, 35.0, 27.1, 19.5, 18.5, 13.0, 12.0, 11.6; IR (thin film, NaCl) 3401, 2959, 2929, 2858, 1514, 1458, 1427, 1248, 1113, 1033, 823, 739, 702 cm<sup>-1</sup>; LRMS (EI, Na) calcd for C<sub>37</sub>H<sub>52</sub>O<sub>5</sub> Si, 627.89 *m/z* (M + Na); observed, 627.56 (M + Na)<sup>+</sup> *m/z*.

**Data for minor diastereomer (*E*)-(2*S*,3*S*,6*R*,7*R*,8*R*)-1-(*tert*-butyldiphenylsilyloxy)-7-(*p*-methoxybenzyloxy)-2,4,6,8-tetramethylnon-4-ene-3,9-**



**diol, 64.**  $[\alpha]_{589}^{20} +4.8^\circ$  ( $c$  1.33,  $\text{CHCl}_3$ );  $^1\text{H}$  NMR (500 MHz,  $\text{CDCl}_3$ )  $\delta$  7.70-7.68 (m, 4H), 7.47-7.39 (m, 6H), 7.27-7.25 (m, 2H), 6.87-6.86 (m, 2H), 5.59 (d,  $J = 10.0$  Hz, 1H), 4.59 (A of AB,  $J = 10.0$  Hz, 1 H), 4.50 (B of AB,  $J = 10.0$  Hz, 1 H), 3.95 (d,  $J = 8.3$  Hz, 1H), 3.80 (s, 3H), 3.78 (dd,  $J = 10.1, 4.0$  Hz, 1H), 3.66-3.63 (m, 1H), 3.58 (dd,  $J = 10.5, 7.0$  Hz, 1H), 3.49 (dd,  $J = 10.7, 5.1$  Hz, 1H), 3.40 (dd,  $J = 4.6, 4.6$  Hz, 1H), 2.82-2.75 (m, 1H), 2.00-1.90 (m, 2H), 1.67 (s, 3H), 1.07 (s, 9H), 1.05 (d,  $J = 6.9$  Hz, 3H), 0.97 (d,  $J = 7.0$  Hz, 3H), 0.67 (d,  $J = 6.9$  Hz, 3H);  $^{13}\text{C}$  NMR (126 MHz,  $\text{CDCl}_3$ )  $\delta$  159.3, 135.84, 135.83, 135.8, 133.0, 133.6, 131.3, 131.2, 130.1, 129.4, 128.02, 128.01, 114.0, 84.6, 84.0, 73.9, 69.5, 55.5, 38.2, 37.7, 35.2, 27.0, 19.3, 18.7, 13.9, 12.0, 11.6; IR (thin film, NaCl) 3430, 2959, 2930, 2860, 1514, 1471, 1428, 1248, 1113, 1036, 822, 742, 702, 668, 613  $\text{cm}^{-1}$ ; LRMS (EI, Na) calcd for  $\text{C}_{37}\text{H}_{52}\text{O}_5$  Si, 627.89  $m/z$  ( $\text{M} + \text{Na}$ ); observed, 627.49 ( $\text{M} + \text{Na}$ ) $^+ m/z$ .

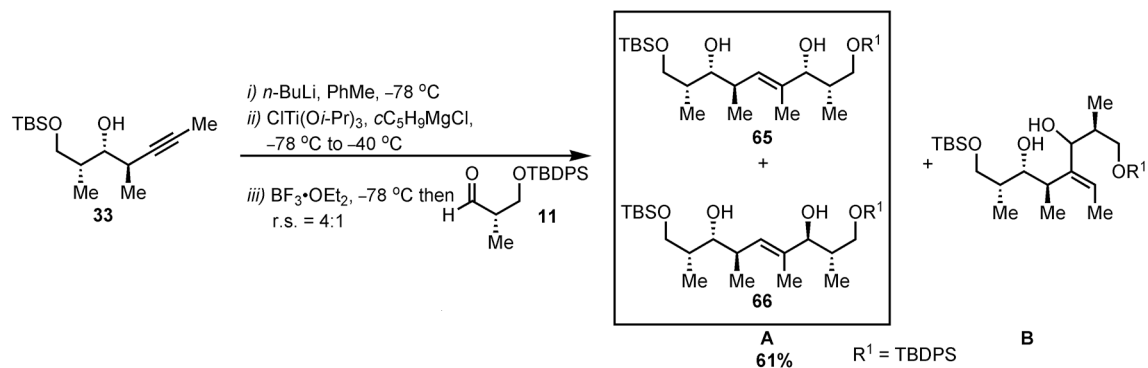

**Entry 11 - synthesis of ene-diol 65 and 66.** To a  $-78^\circ\text{C}$  solution of alkyne **33** (20 mg, 0.074 mmol) in 0.74 mL of toluene, was added sequentially,  $n\text{-BuLi}$  (2.27 M in hexanes; 36  $\mu\text{L}$ , 0.08 mmol),  $\text{ClTi}(\text{O}i\text{-Pr})_3$  (1.0 M in hexanes; 160  $\mu\text{L}$ , 0.16 mmol) and  $c\text{-C}_5\text{H}_9\text{MgCl}$  (2.0 M in diethyl ether; 160  $\mu\text{L}$ , 0.32 mmol) in a dropwise manner via a dry gas-tight syringe. The resulting yellow solution was slowly warmed to  $-40^\circ\text{C}$  and stirred for 2 h during which the reaction turned dark brown. The flask was then cooled to  $-78^\circ\text{C}$

and  $\text{BF}_3 \cdot \text{OEt}_2$  (30  $\mu\text{L}$ , 0.24 mmol) was added in a dropwise manner. Following a stirring period of 10 min at  $-78^\circ\text{C}$ , aldehyde **11** (77 mg, 0.24 mmol) was then added as a solution in toluene (0.2 mL) down the side of the flask via a gas tight syringe. The transfer was completed with additional toluene ( $2 \times 0.1$  mL). Stirring was maintained for 1 h at  $-78^\circ\text{C}$ , before the addition of saturated  $\text{NH}_4\text{Cl}$  solution (0.4 mL). The suspension was allowed to reach ambient temperature before partitioning between EtOAc (5 mL) and water (3 mL). The phases were separated and the aqueous layer was extracted with EtOAc ( $3 \times 5$  mL). The combined organic layer was then washed with sat.  $\text{NaHCO}_3$  solution ( $2 \times 10$  mL), brine ( $1 \times 10$  mL) and dried over anhydrous  $\text{Na}_2\text{SO}_4$ . The crude material was purified by flash column chromatography eluting successively with 2 % (100 mL), 4% (100 mL), 7 % (50 mL), 10 % (50 mL), 15 % (100 mL) and 20 % (100 mL) EtOAc/ hexanes to provide 27 mg (61 %) of diastereomers **65** and **66** as the major regioisomer **A**.

**Entry 11 - Regioselectivity data A:B.** The residue obtained after a titanium reductive coupling using the above procedure was filtered through a short pad of silica eluting successively with 2 % (100 mL), 4 % (50 mL) and 6 % (50 mL) EtOAc/ hexanes until all traces of the partially reduced product of alkyne **33** were removed. All remaining organics were removed by washing the silica with 200 mL of 100 % EtOAc. Analysis of the partially purified mixture by  $^1\text{H}$  NMR shows an approximately 4:1 mixture of regioisomers.

**Data for major diastereomer (*E*)-(2*S*,3*R*,6*R*,7*R*,8*R*)-1-(*tert*-butyldiphenylsilanyloxy)-9-(*tert*-butyldimethylsilanyloxy)-2,4,6,8-tetramethylnon-4-ene-3,9-diol, **65**.**  $[\alpha]_{589}^{20} +6.3^\circ$  ( $c$  1.7,  $\text{CHCl}_3$ );  $^1\text{H}$  NMR (500 MHz,  $\text{CDCl}_3$ )  $\delta$  7.79-7.66

(m, 4H), 7.44-7.38 (m, 6H), 5.40 (d,  $J = 9.5$  Hz, 1H), 4.20 (s, 1H), 3.69-3.64 (m, 4H), 3.52 (d,  $J = 8.6$  Hz, 1H), 2.57-2.53 (m, 1H), 2.41-2.10 (s br, 2H), 1.89-1.79 (m, 2H), 1.59 (s, 3H), 1.08 (s, 9H), 0.96-0.91 (m, 15H), 0.84 (d,  $J = 6.7$  Hz, 3H), 0.07 (s, 6H);  $^{13}\text{C}$  NMR (126 MHz,  $\text{CDCl}_3$ )  $\delta$  137.3, 135.9, 135.8, 133.6, 133.5, 129.96, 129.93, 129.1, 127.9, 78.3, 68.1, 68.0, 37.9, 36.9, 36.1, 27.1, 26.2, 19.5, 18.5, 17.2, 13.6, 11.1, 9.7, -5.2; IR (thin film, NaCl) 3434, 2959, 2930, 2858, 1514, 1256, 1113, 1094, 1006, 836, 778, 701, 614  $\text{cm}^{-1}$ ; LRMS (EI, Na) calcd for  $\text{C}_{33}\text{H}_{58}\text{O}_4\text{Si}$ , 622.00  $m/z$  ( $\text{M} + \text{Na}$ ); observed, 622.64 ( $\text{M} + \text{Na}$ ) $^+$   $m/z$ .

**Entry 11 – Characterization data for 66.** Due to contamination of enol-1,5-diol **66** with an unidentified impurity, characterization was performed on triol **67** obtained after a selective removal of the TBS group.

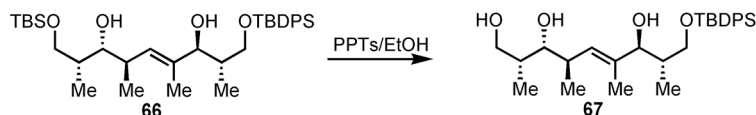

**Data for triol 67.**  $[\alpha]_{589}^{20} +22.4^\circ$  ( $c$  0.59,  $\text{CHCl}_3$ );  $^1\text{H}$  NMR (500 MHz,  $\text{CDCl}_3$ )  $\delta$  7.71-7.68 (m, 4H), 7.48-7.39 (m, 6H), 5.31 (d,  $J = 9.7$  Hz, 1H), 3.98 (d,  $J = 8.2$  Hz, 1H), 3.82 (dd,  $J = 10.2, 3.9$  Hz, 1H), 3.76 (dd,  $J = 10.7, 4.1$  Hz, 1H), 3.69 (dd,  $J = 10.6, 5.7$  Hz, 1H), 3.65 (dd,  $J = 10.1, 2.3$  Hz, 1H), 3.51 (dd,  $J = 9.0, 2.4$  Hz, 1H), 2.66-2.58 (m, 1H), 2.00-2.92 (m, 1H), 1.92-1.83 (m, 1H), 1.70 (d,  $J = 0.8$  Hz, 3H), 1.08 (s, 9H), 1.01 (d,  $J = 7.0$  Hz, 3H), 0.94 (d,  $J = 6.7$  Hz, 3H), 0.72 (d,  $J = 6.9$  Hz, 3H);  $^{13}\text{C}$  NMR (126 MHz,  $\text{CDCl}_3$ )  $\delta$  139.4, 135.84, 135.82, 132.9, 130.8, 130.2, 128.1, 83.8, 77.9, 69.4, 67.9, 37.4, 36.4, 36.0, 27.0, 19.3, 16.9, 14.1, 14.0, 12.2, 9.2; IR (thin film, NaCl) 3411, 2960, 2929, 2858, 1458, 1427, 1113, 1083, 1024, 823, 740, 701  $\text{cm}^{-1}$ ; LRMS (EI, Na) calcd for  $\text{C}_{29}\text{H}_{44}\text{O}_4\text{Si}$ , 507.74  $m/z$  ( $\text{M} + \text{Na}$ ); observed, 507.47 ( $\text{M} + \text{Na}$ ) $^+$   $m/z$ .

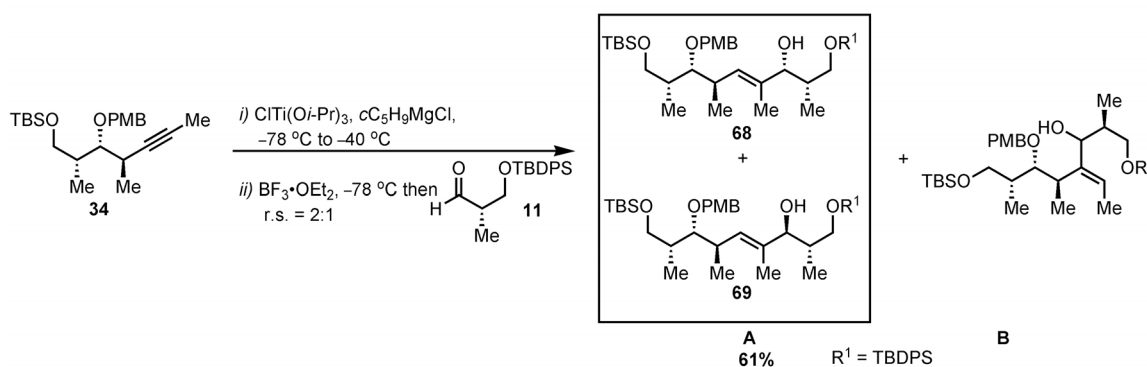

**Entry 12 - synthesis of allylic alcohols 68 and 69.** To a -78 °C solution of alkyne **34** (20 mg, 0.052 mmol) in 0.74 mL of toluene, was added sequentially, ClTi(Oi-Pr)<sub>3</sub> (1.0 M in hexanes; 110 µL, 0.11 mmol) and *c*-C<sub>5</sub>H<sub>9</sub>MgCl (2.0 M in diethyl ether; 110 µL, 0.22 mmol) in a dropwise manner via a dry gas-tight syringe. The resulting yellow solution was slowly warmed to -40 °C and stirred for 2 h during which the reaction turned dark brown. The flask was then cooled to -78 °C and BF<sub>3</sub>·OEt<sub>2</sub> (14 µL, 0.11 mmol) was added in a dropwise manner. Following a stirring period of 10 min at -78 °C, aldehyde **11** (54 mg, 0.17 mmol) was then added as a solution in toluene (0.2 mL) down the side of the flask via a gas tight syringe. The transfer was completed with additional toluene (2 × 0.1 mL). Stirring was maintained for 1 h at -78 °C, before the addition of saturated NH<sub>4</sub>Cl solution (0.4 mL). The suspension was allowed to reach ambient temperature before partitioning between EtOAc (5 mL) and water (3 mL). The phases were separated and the aqueous layer was extracted with EtOAc (3 × 5 mL). The combined organic layer was then washed with sat. NaHCO<sub>3</sub> solution (2 × 10 mL), brine (1 × 10 mL) and dried over anhydrous Na<sub>2</sub>SO<sub>4</sub>. The crude material was purified by flash column chromatography eluting successively with 2 % (100 mL), 4% (100 mL), 7 % (50 mL), 10 % (100 mL), 15 % (100 mL) and 20 % (100 mL) EtOAc/ hexanes to provide 23 mg (61 %) of diastereomers **68** and **69** as the major regioisomer **A**.

**Entry 12 - Regioselectivity data A:B.** The residue obtained after a titanium reductive coupling using the above procedure was filtered through a short pad of silica eluting successively with 2 % (100 mL), 4 % (50 mL) and 6 % (50 mL) EtOAc/ hexanes until all traces of the partially reduced olefinic product of alkyne **33** were removed. All remaining organics were removed by washing the silica with 200 mL of 100 % EtOAc. Analysis of the partially purified mixture by  $^1\text{H}$  NMR shows an approximately 2:1 mixture of regioisomers.

**Entry 12 – Characterization data for 68.** Due to contamination of enol **68** with an unidentified impurity, characterization was performed on ene-diol **63** (see entry 10) obtained after a selective removal of the TBS group.

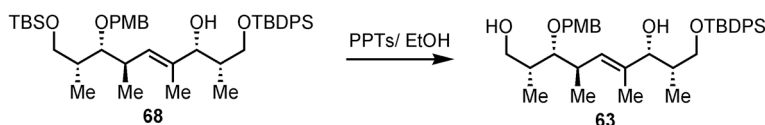

**Data for minor diastereomer (*E*)-(2*S*,3*S*,6*R*,7*R*,8*R*)-1-(*tert*-butyldiphenylsilyloxy)-7-(*p*-methoxybenzyloxy)-9-(*tert*-butyldimethylsilyloxy)-2,4,6,8-tetramethylnon-4-ene-3-ol, **69**.**  $[\alpha]_{589}^{20} -2.1^\circ$  (*c* 0.49,  $\text{CHCl}_3$ );  $^1\text{H}$  NMR (500 MHz,  $\text{CDCl}_3$ )  $\delta$  7.70-7.68 (m, 4H), 7.47-7.39 (m, 6H), 7.26-7.24 (m, 2H), 6.86-6.84 (m, 2H), 5.54 (d,  $J = 9.5$  Hz, 1H), 4.55 (A of AB,  $J = 10.9$  Hz, 1H), 4.48 (B of AB,  $J = 10.9$  Hz, 1H), 3.94 (d,  $J = 8.6$  Hz, 1H), 3.80 (s, 3H), 3.77 (dd,  $J = 10.2, 4.1$  Hz, 1H), 3.63 (dd,  $J = 10.0, 8.0$  Hz, 1H), 3.49 (dd,  $J = 9.8, 6.2$  Hz, 1H), 3.42 (dd,  $J = 9.7, 5.9$  Hz, 1H), 3.37 (dd,  $J = 5.3, 5.3$  Hz, 1H), 2.76-2.69 (m, 1H), 1.97-1.92 (m, 1H), 1.80-1.76 (m, 1H), 1.65 (d,  $J = 0.8$  Hz, 3H), 1.07 (s, 9H), 1.03 (d,  $J = 7.0$  Hz, 3H), 0.96 (d,  $J = 6.8$  Hz, 3H), 0.90 (s, 9H), 0.62 (d,  $J = 6.9$  Hz, 3H), 0.04 (s, 3H), 0.03 (s, 3H);  $^{13}\text{C}$  NMR (126 MHz,  $\text{CDCl}_3$ )  $\delta$  159.1, 135.8, 135.4, 133.0, 131.9, 131.8, 130.1, 129.2, 128.03, 128.01, 113.8, 84.3,

83.6, 74.5, 69.7, 65.8, 39.2, 37.6, 35.7, 27.0, 26.1, 19.3, 18.52, 18.48, 13.9, 12.5, 11.3, -5.17, -5.19; IR (thin film, NaCl) 3487, 2957, 2929, 2858, 1464, 1249, 1113, 1113, 1086, 1036, 832, 771, 701, 668  $\text{cm}^{-1}$ ; LRMS (EI, Na) calcd for  $\text{C}_{43}\text{H}_{66}\text{O}_5\text{Si}_2$ , 742.15  $m/z$  ( $\text{M} + \text{Na}$ ); observed, 742.71 ( $\text{M} + \text{Na}$ )<sup>+</sup>  $m/z$ .

## 2. Assembly of the seco-acid precursor of (9*S*)-dihydroerythronolide A (2<sup>nd</sup> generation approach).

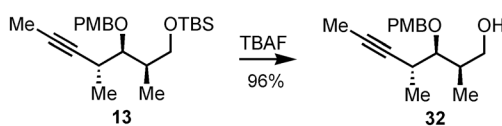

### (2*R*,3*R*,4*R*)-3-(*p*-methoxybenzyloxy)-2,4-dimethyl-5-heptyn-1-ol, **32**.

To a stirring solution of **13** (150 mg, 0.39 mmol) in 3.9 mL of THF, was added TBAF (1.0 M in THF; 0.58 mL, 0.58 mmol) in a dropwise manner. The reaction was stirred overnight at room temperature before pouring in a separatory funnel containing 10 mL of EtOAc and 8 mL of sat.  $\text{NaHCO}_3$  solution. The aqueous layer was extracted with EtOAc (2  $\times$  10 mL). The combined organic layer was then washed with brine (1  $\times$  20 mL) and dried over anhydrous  $\text{Na}_2\text{SO}_4$ . The crude material was purified by flash column chromatography on silica gel eluting successively with 30 % EtOAc -hexanes to provide 103 mg (96 %) of a pure **32**  $[\alpha]_{589}^{20} -19.4^\circ$  ( $c$  2.1,  $\text{CHCl}_3$ );  $^1\text{H}$  NMR (500 MHz,  $\text{CDCl}_3$ )  $\delta$  7.32-7.30 (m, 2H), 6.89-6.87 (m, 2H), 4.74 (A of AB,  $J = 11.0$  Hz, 1H), 4.57 (B of AB,  $J = 11.0$  Hz, 1H), 3.81 (s, 3H), 3.66-3.59 (m, 2H), 3.42 (dd,  $J = 6.0, 4.4$  Hz, 1H), 2.81-2.75 (m, 1H), 2.07-1.94 (m, 1H), 1.88, (s br, 1H), 1.82 (d,  $J = 2.4$  Hz, 3H), 1.17 (d,  $J = 7.1$  Hz, 3H), 0.94 (d,  $J = 7.0$  Hz, 3H);  $^{13}\text{C}$  NMR (126 MHz,  $\text{CDCl}_3$ )  $\delta$  159.4, 130.9 129.9, 114.0, 83.1, 82.0, 77.3, 73.6, 60.1, 55.5, 37.4, 28.8, 18.3, 11.9, 3.9; IR (thin film, NaCl)

3415, 2929, 2917, 2858, 1514, 1456, 1249, 1173, 1035, 821  $\text{cm}^{-1}$ ; LRMS (EI, Na) calcd for  $\text{C}_{17}\text{H}_{24}\text{O}_3$ , 299.37  $m/z$  ( $\text{M} + \text{Na}$ ); observed, 299.20 ( $\text{M} + \text{Na}$ ) $^{+}$   $m/z$

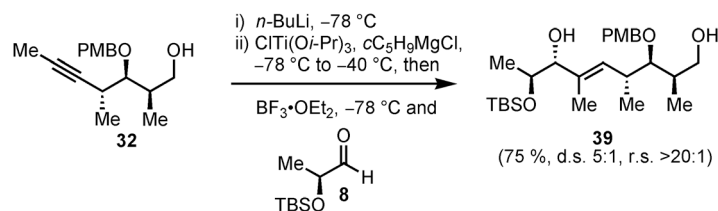

**(*E*)-(2*R*,3*R*,4*R*,7*R*,8*S*)-3-(*p*-methoxybenzyloxy)-8-(*tert*-butyldimethylsilyloxy)-2,4,6-trimethylnon-5-ene-1,7-diol, **39**.** To a  $-78\text{ }^{\circ}\text{C}$  solution of alkyne **32** (300 mg, 1.09 mmol) in 11 mL of toluene, was added sequentially *n*-BuLi (2.5 M in hexanes; 0.48 mL, 1.2 mmol),  $\text{ClTi}(\text{O}i\text{-Pr})_3$  (1.0 M in hexanes; 2.4 mL, 2.4 mmol) and *c*- $\text{C}_5\text{H}_9\text{MgCl}$  (2.0 M in diethyl ether; 2.4 mL, 4.8 mmol) in a dropwise manner via a dry gas-tight syringe. The resulting yellow solution was slowly warmed to  $-40\text{ }^{\circ}\text{C}$  and stirred for 1 h during which the reaction turned dark brown. The flask was then cooled to  $-78\text{ }^{\circ}\text{C}$  and  $\text{BF}_3\cdot\text{OEt}_2$  (0.44 mL, 3.5 mmol) was added in a dropwise manner. Following a stirring period of 10 min at  $-78\text{ }^{\circ}\text{C}$ , aldehyde **8** (660 mg, 3.5 mmol) was then added as a solution in toluene (0.5 mL) down the side of the flask via a gas tight syringe. The transfer was completed with additional toluene ( $2 \times 0.5\text{ mL}$ ). Stirring was maintained for 1 h at  $-78\text{ }^{\circ}\text{C}$ . Saturated  $\text{NH}_4\text{Cl}$  solution (7 mL) was then added and the suspension was allowed to reach ambient temperature before partitioning between EtOAc (20 mL) and water (10 mL). The phases were separated and the aqueous layer was extracted with EtOAc ( $3 \times 20\text{ mL}$ ). The combined organic layer was then washed with sat.  $\text{NaHCO}_3$  solution ( $2 \times 40\text{ mL}$ ), brine ( $1 \times 40\text{ mL}$ ) and dried over anhydrous  $\text{Na}_2\text{SO}_4$ . The crude material was purified by flash column chromatography on silica gel eluting successively with 5 %, 10 %, 15 %, 20 % and 30 % EtOAc -hexanes to provide 379 mg (75 %) of a diastereomeric

**butyldimethylsilanyloxy)-2,4,6-trimethylnon-5-ene-7-ol, 73.** To a stirring mixture of **39** (280 mg, 0.64 mmol) and 0.76 mg of activated 4Å molecular sieves powder in 3.8 mL of CH<sub>2</sub>Cl<sub>2</sub> at 0 °C was added a solution of DDQ (175 mg, 0.77 mmol) in 11.2 mL of CH<sub>2</sub>Cl<sub>2</sub> dropwise via cannula. The resulting slurry was stirred for an additional 20 min at 0 °C before filtering through Celite. The filtrate was washed successively with sat NaHCO<sub>3</sub> and brine before drying over anhydrous Na<sub>2</sub>SO<sub>4</sub>. The solvent was concentrated and the residue was purified by flash column chromatography eluting with 8 % EtOAc/hexanes to afford 232 mg (83 %) of **73**. [ $\alpha$ ]<sub>589</sub><sup>20</sup> +21.8° (*c* 0.82, CHCl<sub>3</sub>); <sup>1</sup>H NMR (500 MHz, C<sub>6</sub>D<sub>6</sub>)  $\delta$  7.62-7.59 (m, 2H), 6.83-6.80 (m, 2H), 5.58 (d, *J* = 9.1 Hz, 1H), 5.34 (s,



1H), 4.08 (s, 1H), 3.97-3.93 (s, 1H), 3.81-3.79 (m, 1H), 3.68 (dd,  $J = 11.0, 1.9$  Hz, 1H), 3.31 (dd,  $J = 9.7, 1.9$  Hz, 1H), 3.26 (s, 3H), 2.74-2.66 (m, 1H), 2.46-2.40 (s br, 1H), 1.71 (d,  $J = 1.1$  Hz, 3H), 1.22-1.18 (m, 1H), 1.16 (m, 3H), 1.06 (d,  $J = 6.3$  Hz, 3H), 0.89 (s, 9H), 0.80 (d,  $J = 6.8$  Hz, 3H), 0.008 (s, 3H), - 0.005 (s, 3H);  $^{13}\text{C}$  NMR (126 MHz,  $\text{C}_6\text{D}_6$ )  $\delta$  160.2, 134.4, 132.5, 130.2, 128.5, 128.3, 127.9, 113.6, 102.0, 83.9, 79.5, 73.7, 71.6, 54.6, 34.1, 30.3, 25.9, 18.2, 17.5, 15.6, 14.1, 11.2, -4.5, -4.9; IR (thin film, NaCl) 3477, 2958, 2929, 2855, 1519, 1463, 1249, 1108, 1081, 1033, 967, 832, 777  $\text{cm}^{-1}$ ; LRMS (EI, Na) calcd for  $\text{C}_{26}\text{H}_{44}\text{O}_5\text{Si}$ , 487.71  $m/z$  (M + Na); observed, 487.42 (M + Na) $^{+}$   $m/z$ .

**(E)-(2R,3R,4R,8S)-1,3-O-(4-methoxy-benzylidene)-8-(tert-**

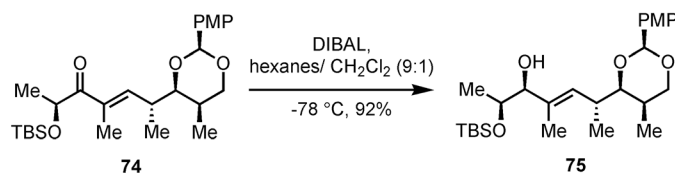

**(*E*)-(2*R*,3*R*,4*R*,7*S*,8*S*)-1,3-*O*-(4-methoxy-benzylidene)-8-(*tert*-butyldimethylsilyloxy)-2,4,6-trimethylnon-5-ene-7-ol, 75.** A solution of **74** (210 mg, 0.45 mmol) in hexanes/dichloromethane (9:1, 4.5 mL) was cooled to  $-78\text{ }^{\circ}\text{C}$  before adding DIBAL (1.0 M in hexanes; 1.1 mL, 1.1 mmol) in a dropwise manner. After 10 min of stirring, 0.5 mL of methanol was added slowly followed by 2 mL of saturated Rochelle salt solution. The resulting slurry was warmed to room temperature before pouring into a separatory funnel containing 10 mL of ethyl acetate and 7 mL of sat. Rochelle salt solution. The phases were separated and the aqueous layer was extracted with EtOAc ( $3 \times 10\text{ mL}$ ) and the combined organic layer was washed with saturated  $\text{NaHCO}_3$  ( $2 \times 20\text{ mL}$ ), brine and dried over anhydrous  $\text{Na}_2\text{SO}_4$ . The solvent was concentrated and the residue was purified by flash column chromatography eluting with 5 % EtOAc/ hexanes affording 194 mg of **75** (92 %).  $[\alpha]_{589}^{20} +61.5^{\circ}$  ( $c\ 0.13$ ,  $\text{CHCl}_3$ );  $^1\text{H}$  NMR (500 MHz,  $\text{CDCl}_3$ )  $\delta$  7.39-7.38 (m, 2H), 6.87-6.85 (m, 2H), 5.42 (s, 1H), 5.37 (d,  $J = 8.8\text{ Hz}$ , 1H), 4.07-4.01 (m, 1H), 3.79 (s, 3H), 3.74-3.69 (m, 1H), 3.67-3.65 (m, 1H), 3.60 (dd,  $J = 9.4, 2.0\text{ Hz}$ , 1H), 2.72-2.62 (m, 1H), 1.72-1.69 (m, 1H), 1.65 (d,  $J = 0.95\text{ Hz}$ , 3H), 1.20 (d,  $J = 6.9\text{ Hz}$ , 3H), 1.03 (d,  $J = 6.0\text{ Hz}$ , 3H), 0.94-0.90 (m, 12 H), 0.079 (s, 6H);  $^{13}\text{C}$  NMR (126 MHz,  $\text{C}_6\text{D}_6$ )  $\delta$  160.2, 135.6, 132.40, 132.38, 128.3, 128.1, 127.9, 113.7, 101.8, 83.6, 83.0, 73.7, 71.8, 54.6, 34.2, 30.4, 26.0, 20.4, 18.2, 15.5, 13.1, 11.2,  $-4.2$ ,  $-4.6$  IR (thin film, NaCl) 3544, 2957, 2929, 2856, 1518, 1463, 1249, 1114, 1034,

832, 777  $\text{cm}^{-1}$ ; LRMS (EI, Na) calcd for  $\text{C}_{26}\text{H}_{44}\text{O}_5\text{Si}$ , 487.77  $m/z$  ( $\text{M} + \text{Na}$ ); observed, 487.46 ( $\text{M} + \text{Na}$ ) $^{+}$   $m/z$ .

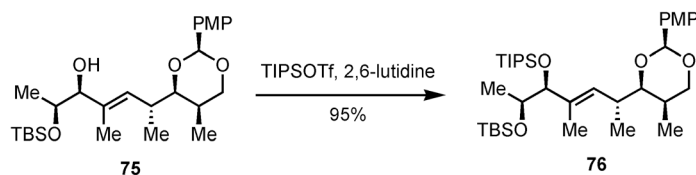

**(*E*)-(2*R*,3*R*,4*R*,7*S*,8*S*)-1,3-*O*-(4-methoxy-benzylidene)-7-(*tri*-**

**isopropylsilanyloxy)-8-(*tert*-butyldimethylsilanyloxy)-2,4,6-trimethylnon-5-ene, 76.**

To a cooled solution of enol **75** (150 mg, 0.32 mmol) and 2,6-lutidine (0.11 mL, 0.97 mmol) in dichloromethane (3.2 mL) at 0 °C, was added TIPS-OTf (0.13 mL, 0.50 mmol). The reaction was held at 0 °C for 1 h before diluting with 20 % EtOAc/ hexanes (10 mL). The organic layer was then washed with saturated  $\text{NaHCO}_3$  (2  $\times$  10 mL), brine and dried over anhydrous  $\text{Na}_2\text{SO}_4$ . The solvent was concentrated and the residue was purified by flash column chromatography eluting with 2 % EtOAc/ hexanes affording 190 mg of **76** (95 %).  $[\alpha]_{589}^{20} +14.5^\circ$  ( $c$  0.64,  $\text{CHCl}_3$ );  $^1\text{H}$  NMR (500 MHz,  $\text{C}_6\text{D}_6$ )  $\delta$  7.61-7.58 (m, 2H), 6.87-6.86 (m, 2H), 5.55 (d,  $J = 9.1$  Hz, 1H), 5.37 (s, 1H), 4.31 (d,  $J = 4.2$  Hz, 1H), 4.09-4.04 (m, 1H), 3.80 (dd,  $J = 11.0, 0.9$  Hz, 1H), 3.71 (dd,  $J = 11.0, 2.0$  Hz, 1H), 3.38 (dd,  $J = 9.6, 1.9$  Hz, 1H), 3.33 (s, 3H), 2.80-2.72 (m, 1H), 1.87 (d,  $J = 1.0$  Hz, 3H), 1.23-1.20 (m, 1H), 1.19-1.14 (m, 27H), 0.98 (s, 9H), 0.87 (d,  $J = 6.8$  Hz, 3H), 0.14 (s, 3H), 0.075 (s, 3H);  $^{13}\text{C}$  NMR (126 MHz,  $\text{C}_6\text{D}_6$ )  $\delta$  160.2, 134.9, 132.6, 130.9, 128.3, 128.1, 113.6, 102.3, 84.2, 80.1, 73.7, 73.3, 54.7, 34.3, 30.4, 26.1, 18.42, 18.39, 18.3, 16.0, 15.8, 12.8, 11.2, -4.45, -4.44; IR (thin film, NaCl) 2959, 2865, 1519, 1463, 1249, 1108, 1000, 883, 834, 774, 680  $\text{cm}^{-1}$ ; LRMS (EI, Na) calcd for  $\text{C}_{35}\text{H}_{64}\text{O}_5\text{Si}_2$ , 644.05  $m/z$  ( $\text{M} + \text{Na}$ ); observed, 644.62 ( $\text{M} + \text{Na}$ ) $^{+}$   $m/z$ .

**(E)-(2R,3R,4R,7S,8S)-3-(p-methoxybenzyloxy)-7-(tri-isopropylsilanyloxy)-8-di(tert-butyl dimethylsilanyloxy)-2,4,6-trimethylnon-5-ene-1-ol, 15.** To a solution of **76** (190 g, 0.31 mmol) in 3 mL of toluene at  $-78\text{ }^{\circ}\text{C}$  was added DIBAL (1.0M in hexanes; 0.97 mL, 0.97 mmol). The reaction was slowly warmed to  $0\text{ }^{\circ}\text{C}$  and kept at this temperature for 30 min. The reaction was cooled to  $-78\text{ }^{\circ}\text{C}$  and 0.5 mL of methanol was added followed by 1.5 mL of Rochelle salt solution. The resulting slurry was warmed to room temperature before pouring into a separatory funnel containing 6 mL of ethyl acetate and 3 mL of sat. Rochelle salt solution. The phases were separated and the aqueous layer was extracted with EtOAc ( $3 \times 6\text{ mL}$ ). The combined organic layer was washed with saturated  $\text{NaHCO}_3$  ( $2 \times 15\text{ mL}$ ), brine and dried over anhydrous  $\text{Na}_2\text{SO}_4$ . The solvent was concentrated and the residue was purified by flash column chromatography eluting with 15 % EtOAc/ hexanes affording 188 mg of **15** (99 %).

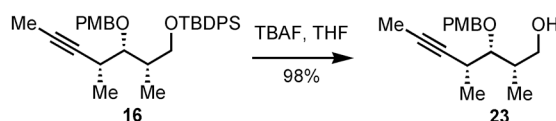

**(2*S*,3*S*,4*R*)-3-(*p*-methoxybenzyloxy)-2,4-dimethyl-5-heptyn-1-ol, 23.** To a stirring solution of **16** (188 mg, 0.37 mmol) in 3.6 mL of THF, was added TBAF (1.0 M in THF; 0.55 mL, 0.55 mmol) in a dropwise manner. The reaction was stirred overnight at room temperature before pouring in a separatory funnel containing 10 mL of EtOAc and 8 mL of sat. NaHCO<sub>3</sub> solution. The aqueous layer was extracted with EtOAc (2 × 10 mL). The combined organic layer was then washed with brine (1 × 20 mL) and dried over

anhydrous Na<sub>2</sub>SO<sub>4</sub>. The crude material was purified by flash column chromatography on silica gel eluting successively with 30 % EtOAc -hexanes to provide 100 mg (98 %) of pure **32** [ $\alpha$ ]<sub>589</sub><sup>20</sup> +0.91° (*c* 0.44, CHCl<sub>3</sub>); <sup>1</sup>H NMR (500 MHz, CDCl<sub>3</sub>)  $\delta$  7.31-7.28 (m, 2H), 6.90-6.87 (m, 2H), 4.62 (A of AB, *J* = 10.9 Hz, 1H), 4.53 (B of AB, *J* = 10.9 Hz, 1H), 3.81 (s, 3H), 3.60 (dd, *J* = 5.6, 5.6 Hz, 1H), 3.48 (dd, *J* = 8.7, 2.7 Hz, 1H), 2.73-2.64 (m, 1H), 2.29-2.21 (m, 1H), 1.79, (d, *J* = 2.4 Hz, 3H), 1.28 (d, *J* = 6.8 Hz, 3H), 0.96 (d, *J* = 7.0 Hz, 3H); <sup>13</sup>C NMR (126 MHz, CDCl<sub>3</sub>)  $\delta$  159.5, 130.9 129.7, 114.1, 83.3, 81.5, 77.7, 74.5, 66.5, 55.5, 38.7 29.8, 18.7, 10.9, 3.8; IR (thin film, NaCl) 3416, 2967, 2919, 2876, 1612, 1514, 1456, 1302, 1249, 1174, 1035, 825 cm<sup>-1</sup>; LRMS (EI, Na) calcd for C<sub>17</sub>H<sub>24</sub>O<sub>3</sub>, 299.37 *m/z* (M + Na); observed, 299.20 (M + Na)<sup>+</sup> *m/z*

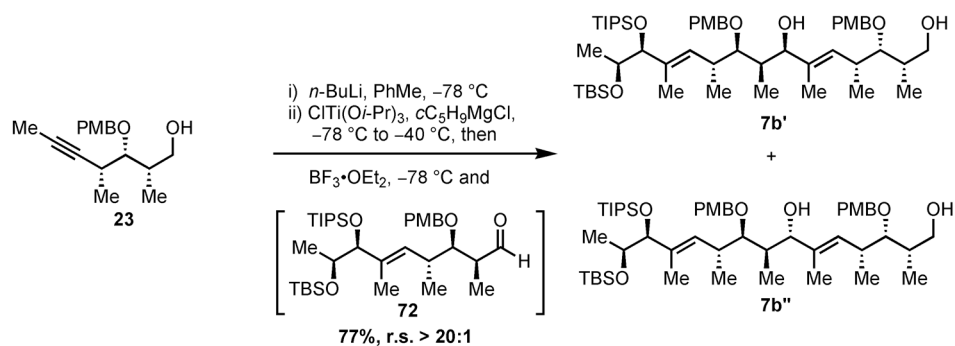

**(*E*)-(2*R*,3*R*,4*R*,7*S*,8*S*)-3,9-di(*p*-methoxybenzyloxy)-13-(*tri*-isopropyl silanyloxy)-14-(*tert*-butyldimethylsilanyloxy)-2,4,6,8,10,12-hexamethylpentadec-5,11-diene-1-ol.** To a -78 °C solution of alkyne **23** (27 mg, 0.097 mmol) in 0.97 mL of toluene, was added sequentially *n*-BuLi (2.5 M in hexanes; 43  $\mu$ L, 0.11 mmol), ClTi(O*i*-Pr)<sub>3</sub> (1.0 M in hexanes; 150  $\mu$ L, 0.15 mmol) and *c*-C<sub>5</sub>H<sub>9</sub>MgCl (2.0 M in diethyl ether; 150  $\mu$ L, 0.30 mmol) in a dropwise manner via a dry gas-tight syringe. The resulting yellow solution was slowly warmed to -40 °C and stirred for 2 h during which the reaction turned dark brown. The flask was then cooled to -78 °C and BF<sub>3</sub>•OEt<sub>2</sub> (32  $\mu$ L,

0.25 mmol) was added in a dropwise manner. Following a stirring period of 10 min at  $-78\text{ }^{\circ}\text{C}$ , aldehyde **72** (20 mg, 0.032 mmol) was then added as a solution in toluene (0.1 mL) down the side of the flask via a gas tight syringe. The transfer was completed with additional toluene ( $2 \times 0.1\text{ mL}$ ). Stirring was maintained for 1 h at  $-78\text{ }^{\circ}\text{C}$ , before the addition of saturated  $\text{NH}_4\text{Cl}$  solution (0.3 mL). The suspension was allowed to reach ambient temperature before partitioning between EtOAc (5 mL) and water (3 mL). The phases were separated and the aqueous layer was extracted with EtOAc ( $3 \times 5\text{ mL}$ ). The combined organic layer was then washed with sat.  $\text{NaHCO}_3$  solution ( $2 \times 10\text{ mL}$ ), brine ( $1 \times 10\text{ mL}$ ) and dried over anhydrous  $\text{Na}_2\text{SO}_4$ . The crude material was purified by flash column chromatography eluting successively with 5 %, 7 %, 10 %, 15%, 20 % and 30 % EtOAc/ hexanes to provide 22 mg (77 %) of **7b'** and **7b''** as the major regioisomer.

**Regioselectivity data for 7b' and 7b''.** The residue obtained after a titanium reductive coupling as described above was filtered through a short pad of silica eluting successively with 5 % (50 mL), 7 % (50 mL), 10 % (50 mL) and 15 % (50 mL) EtOAc/ hexanes until all traces of the partially reduced olefinic product of alkyne **23** were removed. All remaining organics were removed by washing the silica with 200 mL of 100 % EtOAc. Analysis of the partially purified mixture by  $^1\text{H}$  NMR shows a  $\geq 20:1$  mixture of regioisomers.

**Data for major diastereomer (*E,E*)-(2*S*,3*S*,4*R*,7*R*,8*R*,9*R*,10*R*,13*S*,14*S*)-3-(*p*-methoxybenzyloxy)-7-(*tri*-isopropylsilanyloxy)-8-di(*tert*-butyldimethylsilanyloxy)-2,4,6-trimethylnon-5-ene-1-ol, 7b'.**  $[\alpha]_{589}^{20} +3.2^{\circ}$  ( $c\text{ }1.25$ ,  $\text{CHCl}_3$ );  $^1\text{H}$  NMR (400 MHz,  $\text{CDCl}_3$ )  $\delta$  7.31-7.26 (m, 4H), 6.89-6.86 (m, 4H), 5.65 (d,  $J = 9.4\text{ Hz}$ , 1H), 5.21 (d,  $J = 9.9\text{ Hz}$ , 1H), 4.65 (A of AB,  $J = 11.0\text{ Hz}$ , 1H), 4.59 (A of AB,  $J = 10.8\text{ Hz}$ , 1H), 4.55 (B of

AB,  $J = 10.8$  Hz, 1H), 4.51 (B of AB,  $J = 11.0$  Hz, 1H), 4.15 (d,  $J = 4.0$  Hz, 1H), 3.94-3.88 (m, 2H), 3.813 (s, 3H), 3.809 (s, 3H), 3.62 (dd,  $J = 6.0, 2.1$  Hz, 1H), 3.58-3.57 (m, 2H), 3.40 (dd,  $J = 8.9, 2.0$  Hz, 1H), 2.88-2.80 (m, 1H), 2.77-2.65 (m, 1H), 2.02-1.92 (m, 1H), 1.90-1.79 (m, 1H), 1.72 (s, 3H), 1.60 (s, 3H), 1.11 (d,  $J = 6.6$  Hz, 3H), 1.04 (s, 21H), 1.00 (d,  $J = 6.2$  Hz, 3H), 0.96 (d,  $J = 6.9$  Hz, 3H), 0.88-0.85 (m, 12H), 0.83 (d,  $J = 8.1$  Hz, 3H), 0.052 (s, 3H), 0.036 (s, 3H);  $^{13}\text{C}$  NMR (100 MHz,  $\text{CDCl}_3$ )  $\delta$  159.4, 159.2, 135.8, 134.1, 131.4, 131.1, 130.9, 129.7, 129.6, 129.3, 114.0, 113.9, 84.3, 83.6, 80.6, 79.2, 77.4, 74.9, 73.0, 66.5, 55.5, 38.8, 37.5, 36.2, 35.2, 26.1, 18.8, 18.42, 18.36, 18.2, 17.8, 15.8, 12.6, 12.3, 11.6, 10.8, -4.35, -4.45; IR (thin film, NaCl) 3429, 2957, 2930, 2866, 1616, 1514, 1457, 1249, 1104, 1039, 882, 827, 775  $\text{cm}^{-1}$ ; LRMS (EI, Na) calcd for  $\text{C}_{52}\text{H}_{90}\text{O}_8\text{Si}_2$ , 922.44  $m/z$  ( $\text{M} + \text{Na}$ ); observed, 921.88 ( $\text{M} + \text{Na}$ ) $^+$   $m/z$ .

**Data for minor diastereomer (*E,E*)-(2*S*,3*S*,4*R*,7*S*,8*R*,9*R*,10*R*,13*S*,14*S*)-3-(*p*-methoxybenzyloxy)-7-(*tri*-isopropylsilanyloxy)-8-di(*tert*-butyldimethylsilanyloxy)-2,4,6-trimethylnon-5-ene-1-ol, 7b $''$ .**  $[\alpha]_{589}^{20} - 10.8^\circ$  ( $c$  0.90,  $\text{CHCl}_3$ );  $^1\text{H}$  NMR (500 MHz,  $\text{CDCl}_3$ )  $\delta$  7.30-7.26 (m, 4H), 6.88-6.86 (m, 4H), 5.59 (d,  $J = 9.6$  Hz, 1H), 5.31 (d,  $J = 9.9$  Hz, 1H), 4.76 (A of AB,  $J = 10.7$  Hz, 1H), 4.59 (B of AB,  $J = 10.8$  Hz, 1H), 4.54 (B of AB,  $J = 10.8$  Hz, 1H), 4.43 (B of AB,  $J = 10.7$  Hz, 1H), 4.16 (d,  $J = 4.2$  Hz, 1H), 4.08 (s, 1H), 3.95-3.90 (m, 1H), 3.809 (s, 3H), 3.806 (s, 3H), 3.82-3.75 (m, 1H), 3.59 (s br, 2H), 3.51 (dd,  $J = 5.3, 3.6$  Hz, 1H), 3.42 (d,  $J = 8.6$  Hz, 1H), 3.02-2.95 (m, 2H), 2.76-2.69 (m, 1H), 1.99-1.86 (m, 2H), 1.73 (d,  $J = 0.7$  Hz, 3H), 1.54 (s, 3H), 1.10 (d,  $J = 6.6$  Hz, 3H), 1.08-1.02 (m, 24H), 0.99 (d,  $J = 6.2$  Hz, 3H), 0.88-0.81 (m, 15H), 0.060 (s, 3H), 0.043 (s, 3H);  $^{13}\text{C}$  NMR (126 MHz,  $\text{CDCl}_3$ )  $\delta$  159.4, 159.3, 134.8, 134.7, 131.2, 131.0, 129.6, 129.3, 129.1, 128.0, 114.02, 113.93, 86.9, 84.5, 79.4, 79.2, 74.9, 72.9, 72.8, 66.7,

55.5, 38.9, 37.8, 36.3, 35.3, 26.1, 18.4, 18.3, 18.2, 17.8, 17.7, 16.0, 14.0, 12.6, 10.7, 7.7, -4.37, -4.40; IR (thin film, NaCl) 3408, 2956, 2931, 2865, 1613, 1514, 1463, 1248, 1102, 1039, 883, 825, 775, 680  $\text{cm}^{-1}$ ; LRMS (EI, Na) calcd for  $\text{C}_{52}\text{H}_{90}\text{O}_8\text{Si}_2$ , 922.44  $m/z$  ( $\text{M} + \text{Na}$ ); observed, 922.93 ( $\text{M} + \text{Na}$ )<sup>+</sup>  $m/z$ .

**References:**

1. Marshall, J. A.; Yanik, Y. M. *Org. Lett.* **2000**, *2*, 2173-2175.
2. Bahadoor, A.B.; Flyer, A.; Micalizio, G.C. *J. Am. Chem. Soc.* **2005**, *127*, 3694-3695.
